# Supplementary material for: Geospatial Analyses of Recent Household Surveys to Assess Changes in the Distribution of Zero-Dose Children and Their Associated Factors before and during the COVID-19 Pandemic in Nigeria
Source: MDPI journal article supplement (doi:10.3390/vaccines11121830), 2023-12-08
Supplement: s1 [file s1]

# Geospatial analyses of recent household surveys to assess changes in the distribution of zero-dose children and associated factors before and during the Covid-19 pandemic in Nigeria

Justice MK Aheto, Iyanuloluwa Olowe, Ho Man Theophilus Chan, Adachi Ekeh, Boubacar Dieng, Biyi Fafunmi, Hamidreza Setayesh, Brian Atuhaire, Jessica Crawford, Andrew J Tatem, C. Edson Utazi

## Supporting information

Table S1: Description and coding of outcome variables and covariate factors

| Variable name and labels                                                                              | Description and coding                                                                                          | Reference category |
|-------------------------------------------------------------------------------------------------------|-----------------------------------------------------------------------------------------------------------------|--------------------|
| <b>Outcome variables (binomial)</b>                                                                   |                                                                                                                 |                    |
| Received DTP1 (PENTA1)                                                                                | No/don't know - 0, reported by mother/ vaccination date on card/ vaccination marked on card - 1                 | No/don't know - 0  |
| Received MCV1                                                                                         | No/don't know - 0, reported by mother/ vaccination date on card/ vaccination marked on card - 1                 | No/don't know - 0  |
| Composite coverage (i.e., receipt of at least one of the 4 basic vaccines - BCG, OPV0, DTP1 and MCV1) | Yes - 1, No - 0<br>(BCG and OPV0 coded similar to DTP1 and MCV1)                                                | No - 0             |
| <b>Predictor variables</b>                                                                            |                                                                                                                 |                    |
| Sex of child                                                                                          | Male - 1, female - 2                                                                                            | Male - 0           |
| Skilled birth attendance                                                                              | No - 0, yes - 1                                                                                                 | No - 0             |
| Birth quarter                                                                                         | Jan-Mar - 0, Apr-Jun - 1, Jul-Sep - 2, Oct-Dec - 3                                                              | Jan-March - 0      |
| Mother received tetanus (TT)                                                                          | No - 0, yes - 1                                                                                                 | No - 0             |
| ANC visits                                                                                            | 0 - 0, 1-3 - 1, ≥4 - 2                                                                                          | 0 - 0              |
| Mother's age                                                                                          | 15-19 - 0, 20-29 - 1, 30-39 - 2, 40-49 - 3                                                                      | 15-19 - 0          |
| Marital status of mother                                                                              | Never in union - 0, married/ living with partner - 1, divorced/widowed/ no longer living together/separated - 2 | Never in union - 0 |
| Mother's education                                                                                    | No education - 0, primary - 1, junior/secondary - 2, higher/tertiary - 3                                        | No education - 0   |
| Mother's religion                                                                                     | Islam - 0, Christian/Traditionalist/others - 1                                                                  | Islam - 0          |

|                                          |                                                                                                    |                            |
|------------------------------------------|----------------------------------------------------------------------------------------------------|----------------------------|
| Access to media                          | No - 0, yes (listens to radio or tv or reads newspaper at least once in a week) - 1                | No - 0                     |
| Mother's access to mobile phone/internet | No - 0, yes - 1                                                                                    | No - 0                     |
| Mother's land ownership                  | No - 0, yes - 1                                                                                    | No - 0                     |
| Mother had health insurance              | No - 0, yes - 1                                                                                    | No - 0                     |
| Mother's ethnicity                       | Hausa/Fulani - 0, Yoruba - 1, Igbo - 2, Others (Kanuri, Tiv, etc.) - 3                             | Hausa/Fulani - 0           |
| Sex of household head                    | Female - 0, male - 1                                                                               | Female - 0                 |
| Household wealth                         | Poorer/poorest - 0, middle - 1, rich/richest - 2                                                   | Poorer/poorest - 0         |
| Access to bank account                   | No - 0, yes - 1                                                                                    | No - 0                     |
| Household size                           | Large ( $\geq 9$ ) - 0, medium (5 to 8) - 1, small ( $\leq 4$ ) - 2                                | Large ( $\geq 9$ ) - 0     |
| Length of stay in household              | <1year/visitor - 0, 1-3years - 1, 4-5years - 2, >5years/always - 3                                 | <1year/visitor - 0         |
| Rural/urban                              | Rural - 0, urban - 1                                                                               | Rural - 0                  |
| Region                                   | North west - 0, north east - 1, north central - 2, south east - 3, south south - 4, south west - 5 | North west - 0             |
| Livestock density index                  | Lower (0-60.2) - 0, medium (60.3-123.7) - 1, higher (123.8-660.0) - 2                              | Higher (123.8-660.0) - 2   |
| Travel time (motorized)                  | Lower (0-2.4) - 0, medium (2.5-8.3) - 1, higher (8.4-181.9) - 2                                    | Higher (8.4-181.9) - 2     |
| Distance to coastline                    | Lower (0.5-0.135.3) - 0, medium (135.4-472.7) - 1, higher (472.8-999.2) - 2                        | Higher (472.8-999.2) - 2   |
| Distance to edge of cultivation area     | Lower (-12.9- -0.5) - 0, medium (-0.4-0.3) - 1, higher (0.31-14.0) - 2                             | Higher (0.31-14.0) - 2     |
| Distance to conflict area                | Lower (11.4-142.2) - 0, medium (142.3-347.2) - 1, higher (347.3-10790.2) - 2                       | Higher (347.3-10790.2) - 2 |
| Number of wet days                       | Lower (37.4-82.7) - 0, medium (82.8-123.0) - 1, higher (123.1-179.8) - 2                           | Higher (123.1-179.8) - 2   |
| Proximity to national borders            | Lower (0.6-69.5) - 0, medium (69.6-158.0) - 1, higher (158.1-394.0) - 2                            | Higher (158.1-394.0) - 2   |
| Proximity to protected areas             | Lower (0.3-132.0) - 0, medium (132.1-272.2) - 1, higher (272.3-699.5) - 2                          | Higher (272.3-699.5) - 2   |
| Day time land surface temperature        | Lower (25.9-31.1) - 0, medium (31.2-34.9) - 1, higher (35.0-38.7) - 2                              | Higher (35.0-38.7) - 2     |
| Enhanced vegetation index                | Lower (375.9-2340.8) - 0, medium (2340.9-3067.1) - 1, higher (3067.2-4322.4) - 2                   | Higher (3067.2-4322.4) - 2 |

|               |                                                                       |                        |
|---------------|-----------------------------------------------------------------------|------------------------|
| Poverty index | Lower (0.06-0.72) - 0, medium (0.73-0.82) - 1, higher (0.83-0.94) - 2 | Higher (0.83-0.94) - 2 |
| Slope         | Lower (0.27-1.06) - 0, medium (1.07-2.04) - 1, higher (2.05-14.9) - 2 | Higher (2.05-14.9) - 2 |

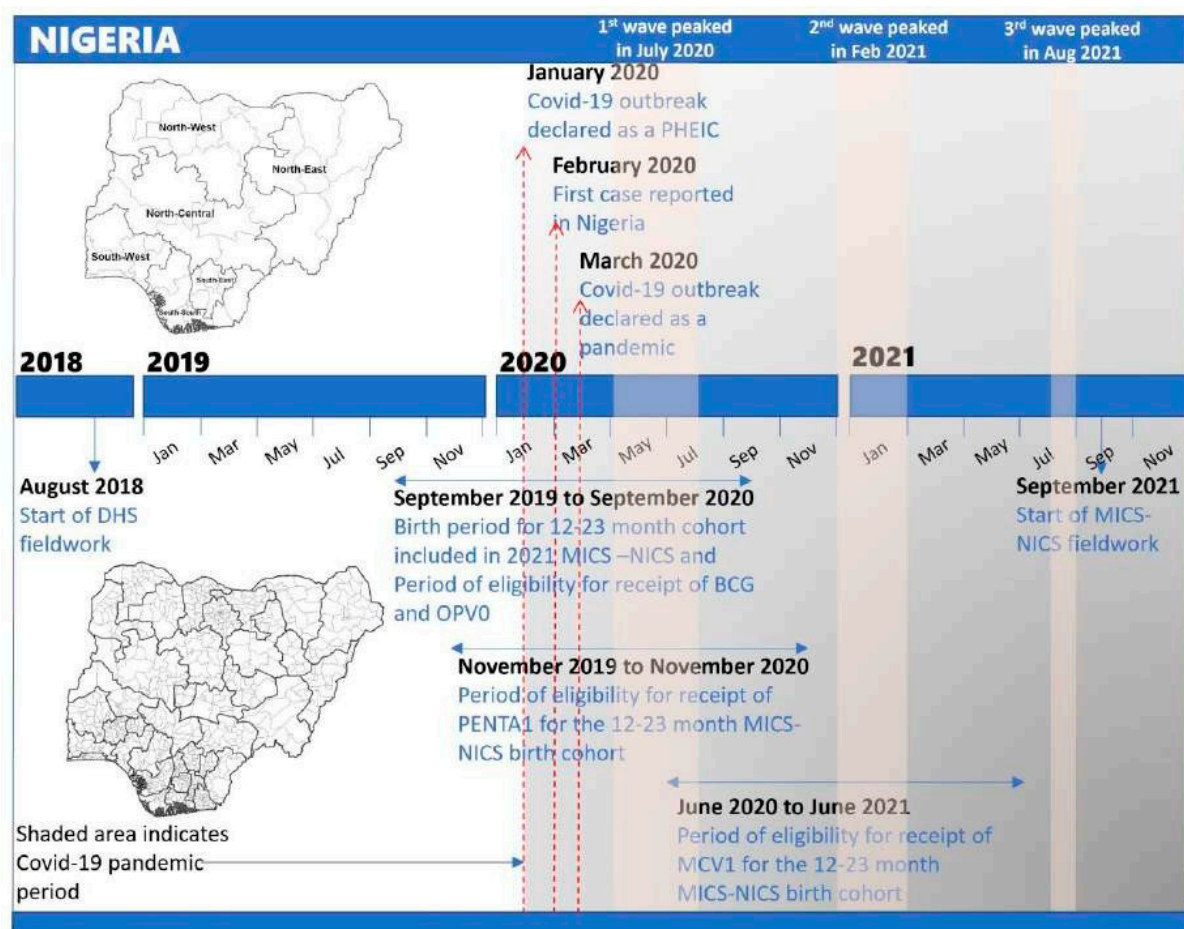

Figure S1: Timeline of the 2018 DHS and 2021 MICS-NICS surveys in Nigeria showing the time intervals the 12-23-month birth cohort analysed became eligible to receive the vaccines included in the study. The timeline also shows the history of the Covid-19 pandemic in Nigeria and important related events.

## **Geospatial covariate description and processing steps**

The geospatial covariates used in the analyses, as described in the main manuscript were travel time to the nearest health facility providing routine immunization (RI) services, livestock density and Enhanced Vegetation Index (EVI). These covariates were obtained from the sources mentioned in Table S2 and were processed as follows. Using ESRI ArcGIS v10.7, standardised gridded covariate layers were processed at 1km x 1 km for Nigeria from the raw data sets. For EVI, the data for the raster layers were taken from the 5-year period prior to the DHS survey, however, this was not possible for the other covariates. These layers were further processed to obtain the average EVI over the period. The livestock density index used in our work was obtained as the average of the individual livestock densities (i.e., cattle, chicken, goat, pig, and sheep) listed in Table S2. Following these, covariate data values were extracted from each raster layer for each DHS cluster location using R. Prior to extraction, considerations for urban and rural clusters were made as in previous work [1] and buffers were created for data extraction to calculate a mean value at 2 km for urban areas and 5 km for rural areas. We present the surfaces of the resulting geospatial covariates and the extracted values at the cluster level in Figure S1.

Table S2: Description and sources of geospatial covariates used in our analyses.

|    |                                                               |                           |           |            |                                                                                                                                                                                                                                                                                                                                                                                                                                                                                                                                                                                              |
|----|---------------------------------------------------------------|---------------------------|-----------|------------|----------------------------------------------------------------------------------------------------------------------------------------------------------------------------------------------------------------------------------------------------------------------------------------------------------------------------------------------------------------------------------------------------------------------------------------------------------------------------------------------------------------------------------------------------------------------------------------------|
| 1  | Cattle density                                                | No. of cattle per sq km   | 2010      | Continuous | Gilbert, M. <i>et al.</i> (2018) Global Distribution Data for Cattle, Buffaloes, Horses, Sheep, Goats, Pigs, Chickens and Ducks in 2010. Nature Scientific data, 5:180227. doi: 10.1038/sdata.2018.227                                                                                                                                                                                                                                                                                                                                                                                       |
| 2  | Chicken density                                               | No. of chickens per sq km | 2010      | Continuous | Gilbert, M. <i>et al.</i> (2018) Global Distribution Data for Cattle, Buffaloes, Horses, Sheep, Goats, Pigs, Chickens and Ducks in 2010. Nature Scientific data, 5:180227. doi: 10.1038/sdata.2018.227                                                                                                                                                                                                                                                                                                                                                                                       |
| 3  | Goat density                                                  | No. of goats per sq km    | 2010      | Continuous | Gilbert, M. <i>et al.</i> (2018) Global Distribution Data for Cattle, Buffaloes, Horses, Sheep, Goats, Pigs, Chickens and Ducks in 2010. Nature Scientific data, 5:180227. doi: 10.1038/sdata.2018.227                                                                                                                                                                                                                                                                                                                                                                                       |
| 4  | Pig density                                                   | No. Of pigs per sq km     | 2010      | Continuous | Gilbert, M. <i>et al.</i> (2018) Global Distribution Data for Cattle, Buffaloes, Horses, Sheep, Goats, Pigs, Chickens and Ducks in 2010. Nature Scientific data, 5:180227. doi: 10.1038/sdata.2018.227                                                                                                                                                                                                                                                                                                                                                                                       |
| 5  | Sheep density                                                 | No. Of sheep per sq km    | 2010      | Continuous | Gilbert, M. <i>et al.</i> (2018) Global Distribution Data for Cattle, Buffaloes, Horses, Sheep, Goats, Pigs, Chickens and Ducks in 2010. Nature Scientific data, 5:180227. doi: 10.1038/sdata.2018.227                                                                                                                                                                                                                                                                                                                                                                                       |
| 6  | Travel time (motorized)                                       | Minutes                   | 2018      | Continuous | [Produced from locations of health facilities in Nigeria using the methodology in] Weiss, D.J. <i>et al.</i> (2018). A global map of travel time to cities to access inequalities in accessibility in 2015. <i>Nature</i> .                                                                                                                                                                                                                                                                                                                                                                  |
| 7  | Poverty index                                                 |                           |           |            | Tatem AJ, Gething PW, Bhatt S, Weiss D and Pezzulo C (2013) Pilot high resolution poverty maps, University of Southampton/Oxford. ( <a href="http://www.worldpop.org.uk/resources/docs/WorldPop-poverty-mapping-methods.pdf">http://www.worldpop.org.uk/resources/docs/WorldPop-poverty-mapping-methods.pdf</a> )<br>G-Econ Project, Yale University, 2009. ( <a href="http://gecon.yale.edu/">http://gecon.yale.edu/</a> )                                                                                                                                                                  |
| 8  | Average Modis Enhanced Vegetation Index between 2013 and 2018 | EVI (0 to 1)              | 2013-2018 | Continuous | Didan, K. (2015). MOD13A3 MODIS/Terra vegetation Indices Monthly L3 Global 1km SIN Grid V006. NASA EOSDIS LP DAAC.                                                                                                                                                                                                                                                                                                                                                                                                                                                                           |
| 9  | Day time land surface temperature                             | Kelvin, scaled 0.02       |           | Continuous | Wan, Z., Hook, S., Hulley, G. (2021). MODIS/Terra Land Surface Temperature/Emissivity 8-Day L3 Global 1km SIN Grid V061 [Data set]. NASA EOSDIS Land Processes DAAC. <a href="https://doi.org/10.5067/MODIS/MOD11A2.061">https://doi.org/10.5067/MODIS/MOD11A2.061</a>                                                                                                                                                                                                                                                                                                                       |
| 10 | Slope                                                         | Degrees                   | 2000      | Continuous | WorldPop ( <a href="http://www.worldpop.org">www.worldpop.org</a> - School of Geography and Environmental Science, University of Southampton; Department of Geography and Geosciences, University of Louisville; Departement de Geographie, Universite de Namur) and Center for International Earth Science Information Network (CIESIN), Columbia University (2018). Global High Resolution Population Denominators Project - Funded by The Bill and Melinda Gates Foundation (OPP1134076). <a href="https://dx.doi.org/10.5258/SOTON/WP00644">https://dx.doi.org/10.5258/SOTON/WP00644</a> |

|    |                               |    |  |            |                                                                                                                                                                                                                                                                                                                                                                                                                                                                                                                                                          |
|----|-------------------------------|----|--|------------|----------------------------------------------------------------------------------------------------------------------------------------------------------------------------------------------------------------------------------------------------------------------------------------------------------------------------------------------------------------------------------------------------------------------------------------------------------------------------------------------------------------------------------------------------------|
| 11 | Proximity to protected areas  | km |  | Continuous | WorldPop (www.worldpop.org - School of Geography and Environmental Science, University of Southampton; Department of Geography and Geosciences, University of Louisville; Departement de Geographie, Universite de Namur) and Center for International Earth Science Information Network (CIESIN), Columbia University (2018). Global High Resolution Population Denominators Project - Funded by The Bill and Melinda Gates Foundation (OPP1134076).<br><a href="https://dx.doi.org/10.5258/SOTON/WP00644">https://dx.doi.org/10.5258/SOTON/WP00644</a> |
| 12 | Proximity to national borders | km |  | Continuous | Department of State's Office of the Geographer. 2018. "Department of State Large-Scale International Boundary (LSIB)." Via ESRI.<br><a href="https://www.arcgis.com/home/item.html?id=3e650cfe52b84bffacb86d028f1f0514#">https://www.arcgis.com/home/item.html?id=3e650cfe52b84bffacb86d028f1f0514#</a>                                                                                                                                                                                                                                                  |

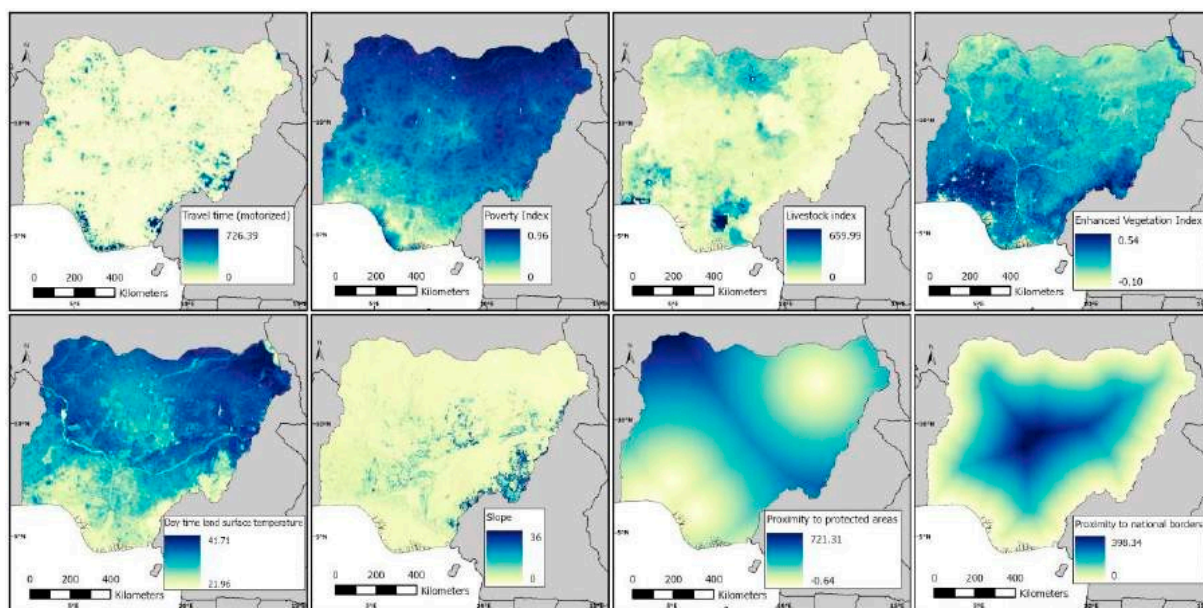

Figure S2: Geospatial covariates used in our analyses (top row) and the corresponding cluster-level values (bottom row).

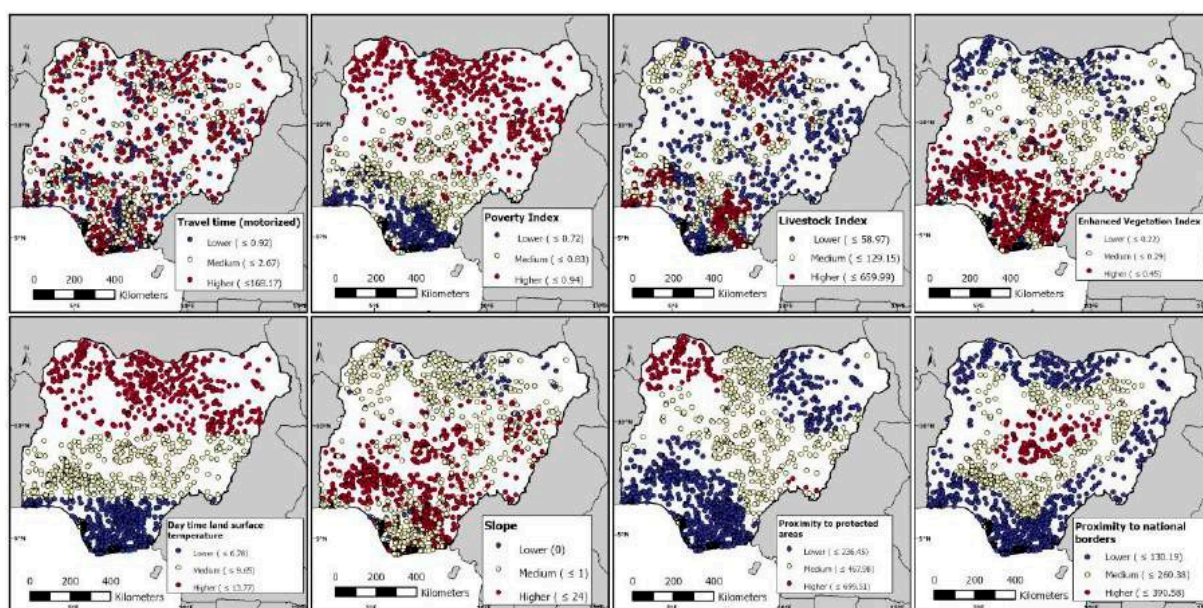

Figure S3. Classification of the geospatial covariates included in the multi-level analyses using the tertiles of the distribution of each covariate.



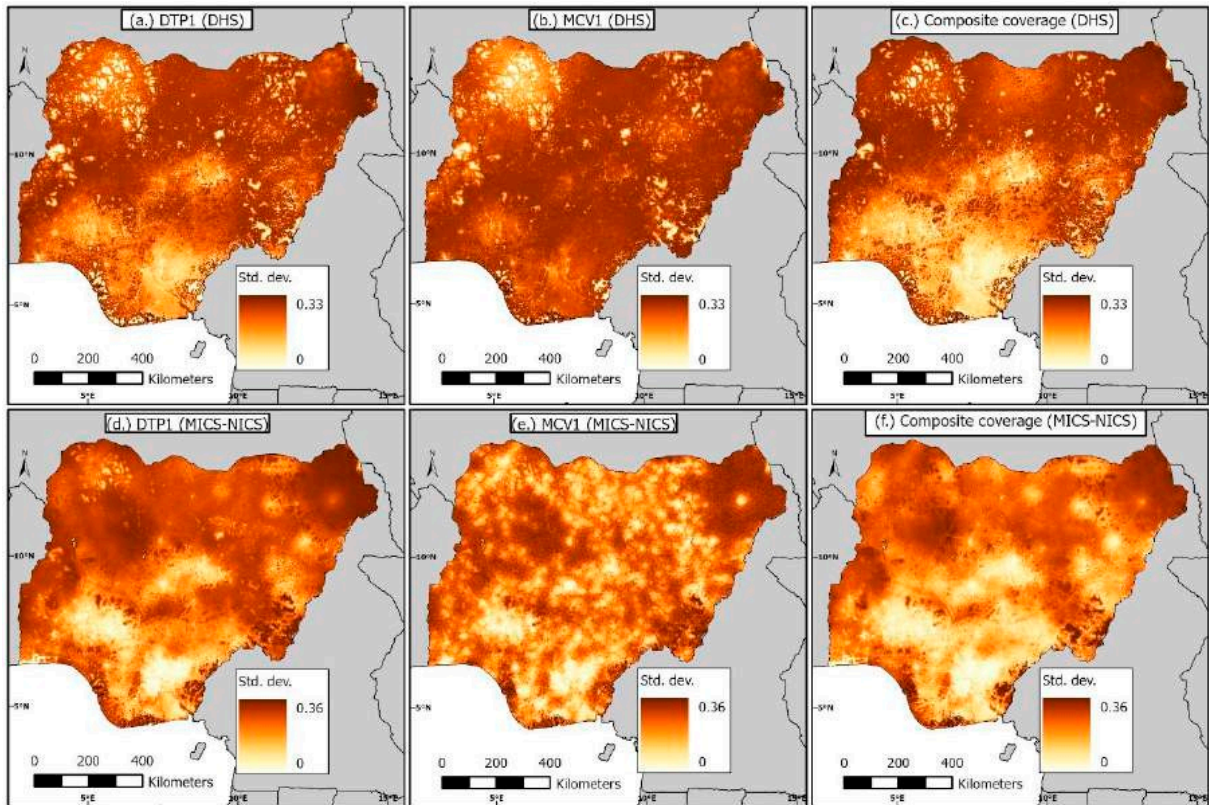

Figure S4: Uncertainty estimates associated with the coverage estimates for DTP1 (a), MCV1 (b), and composite coverage (c) for 2018 DHS (top panel) and 2021 MICS-NICS (bottom panel) for DTP1 (d), MCV1 (e) and composite coverage (f) at 1 x 1km resolution for Nigeria.

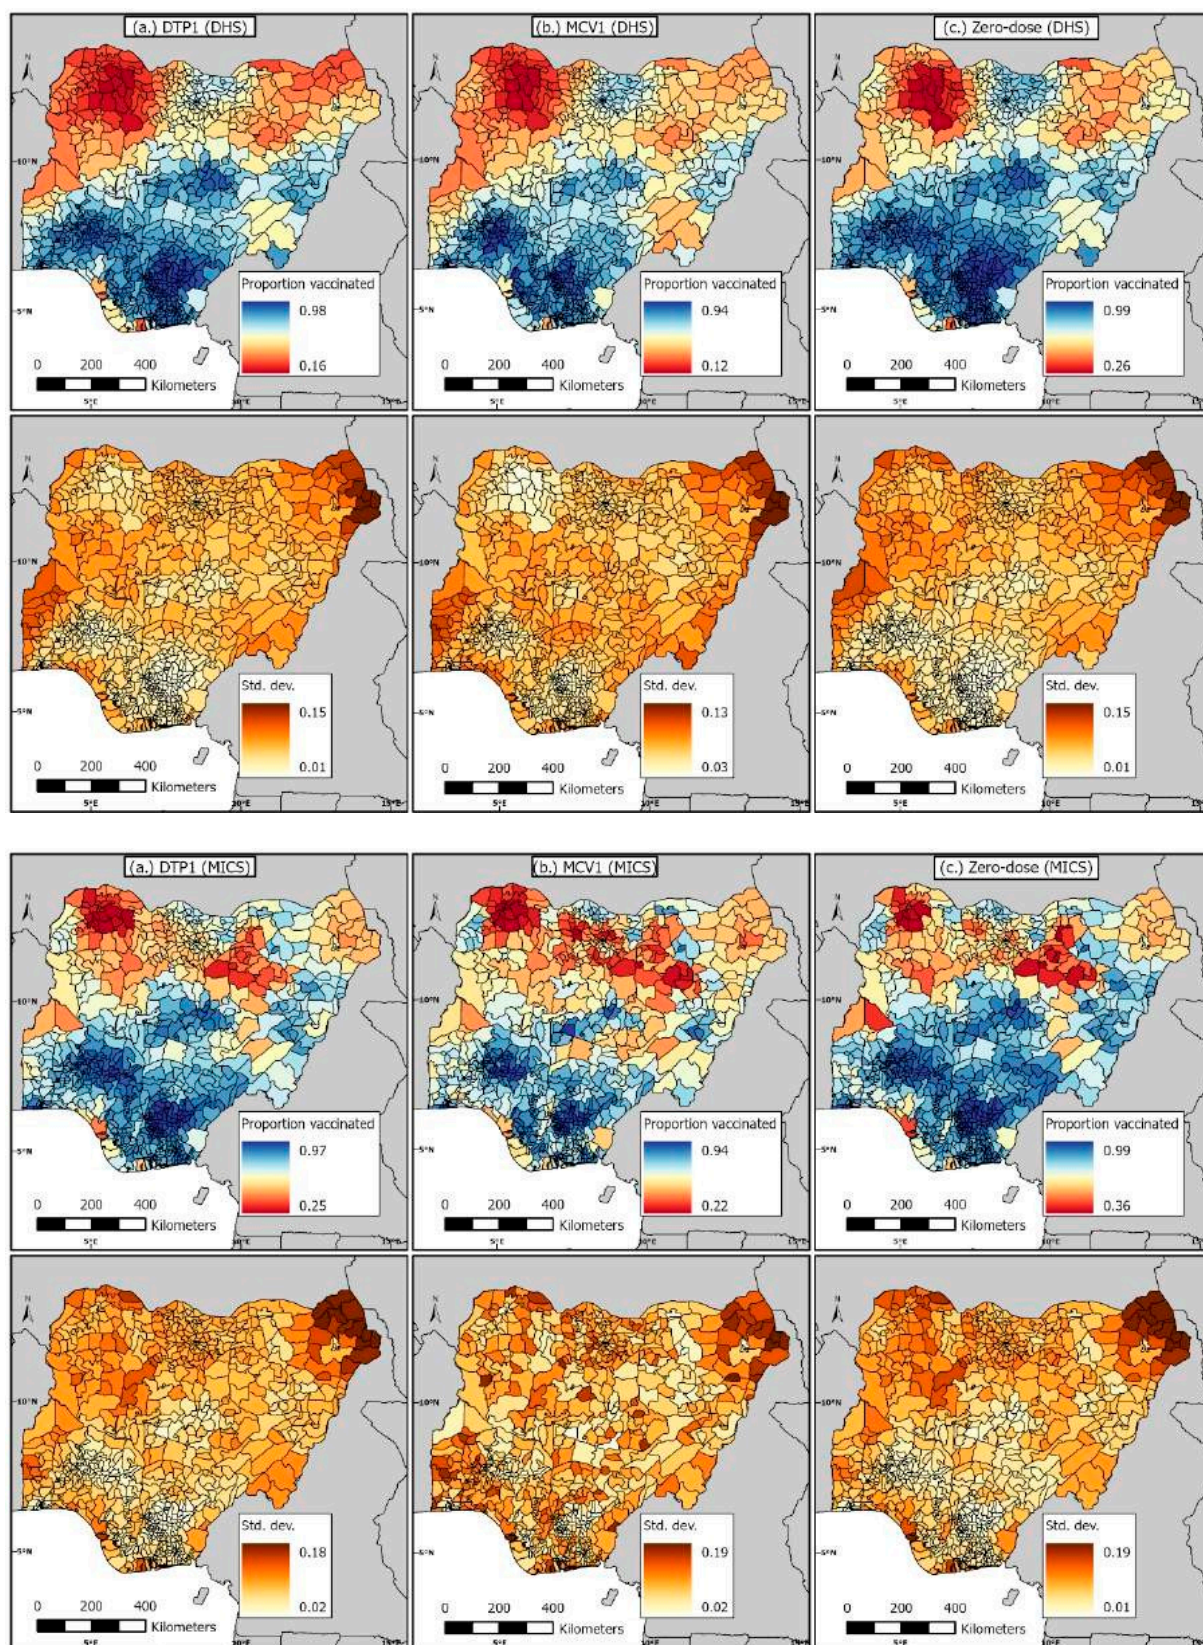

Figure S5: District level coverage estimates and associated uncertainties for DTP1, MCV1, and Composite Coverage (CC) for both DHS and MICS-NICS.



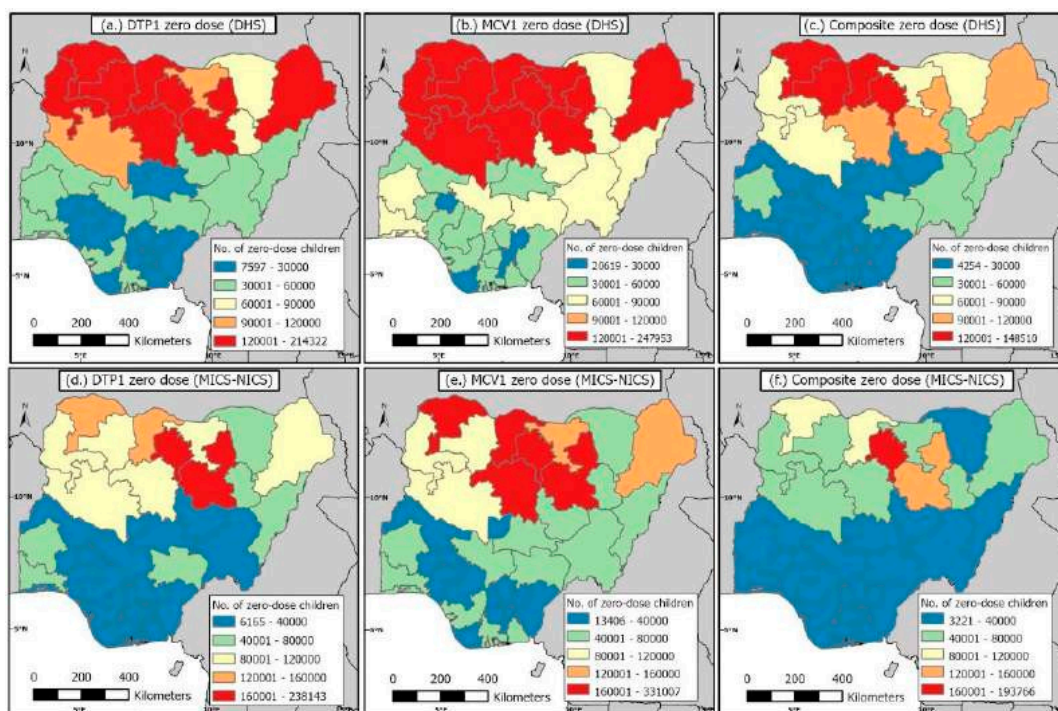

Figure S6: Estimates of numbers of DTP, MCV and composite zero-dose children at the state level before the pandemic in 2018 (DHS) and during the pandemic in 2021 (MICS-NICS)

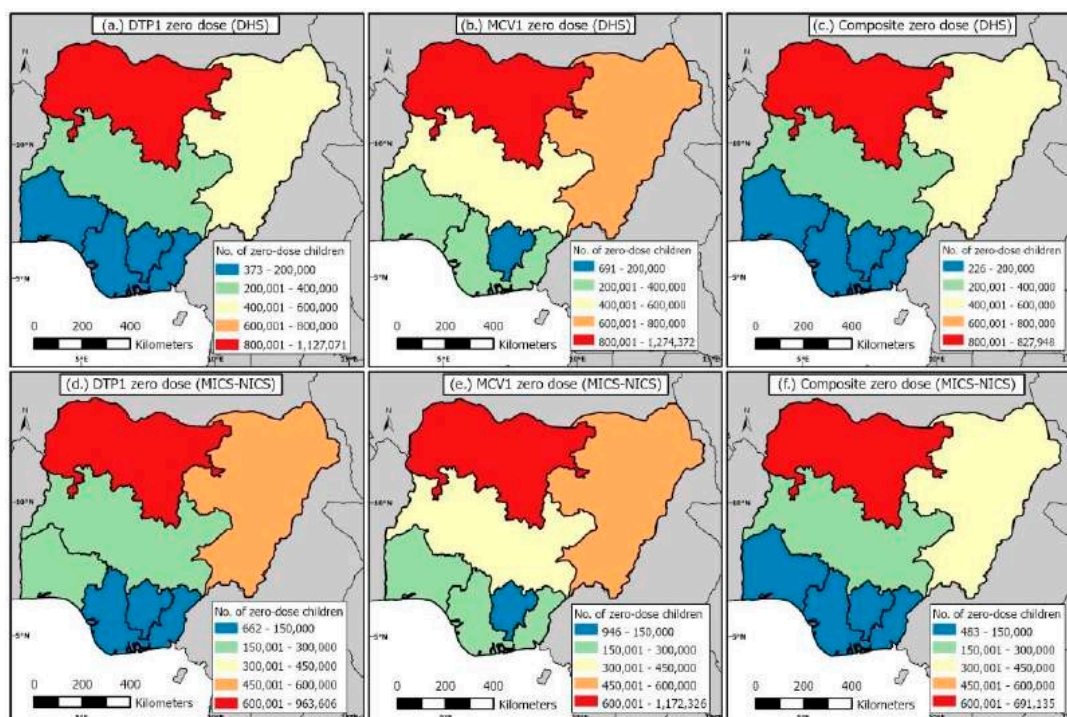

Figure S7: Estimates of numbers of DTP, MCV and composite zero-dose children at the regional level before the pandemic in 2018 (DHS) and during the pandemic in 2021 (MICS-NICS)

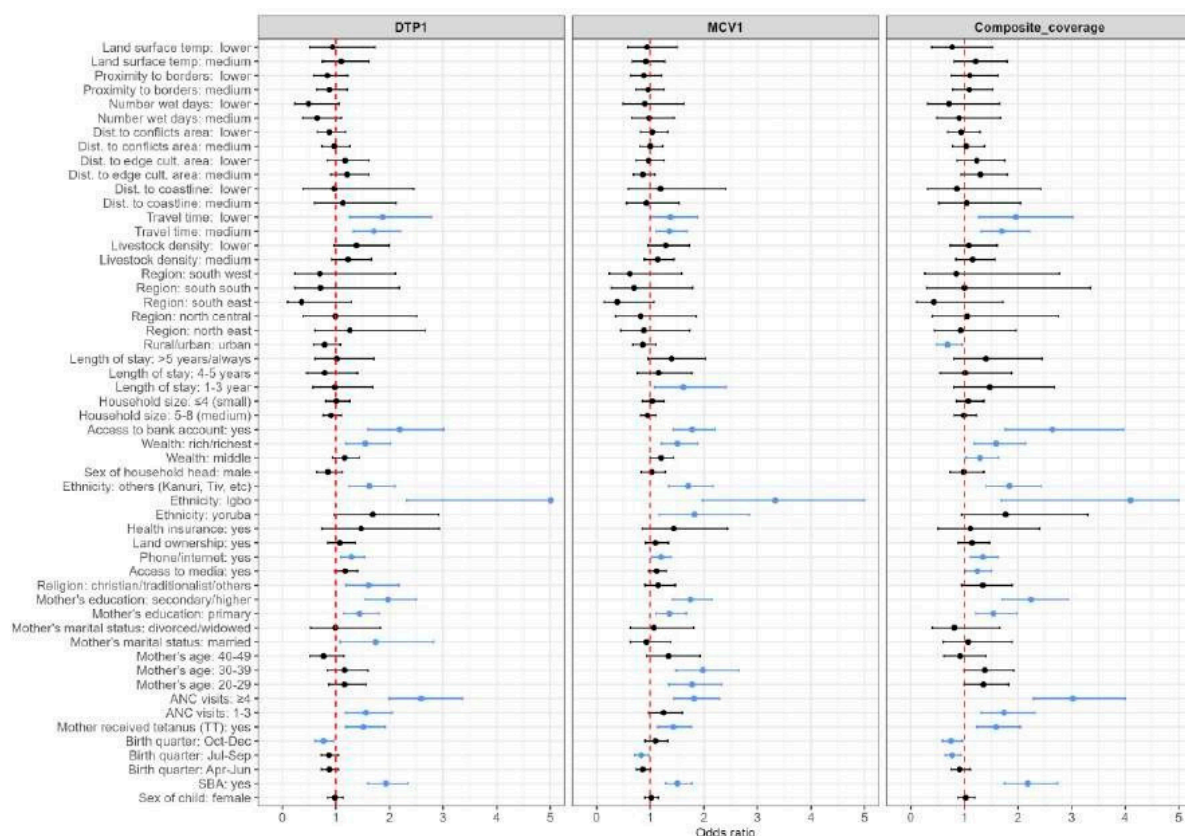

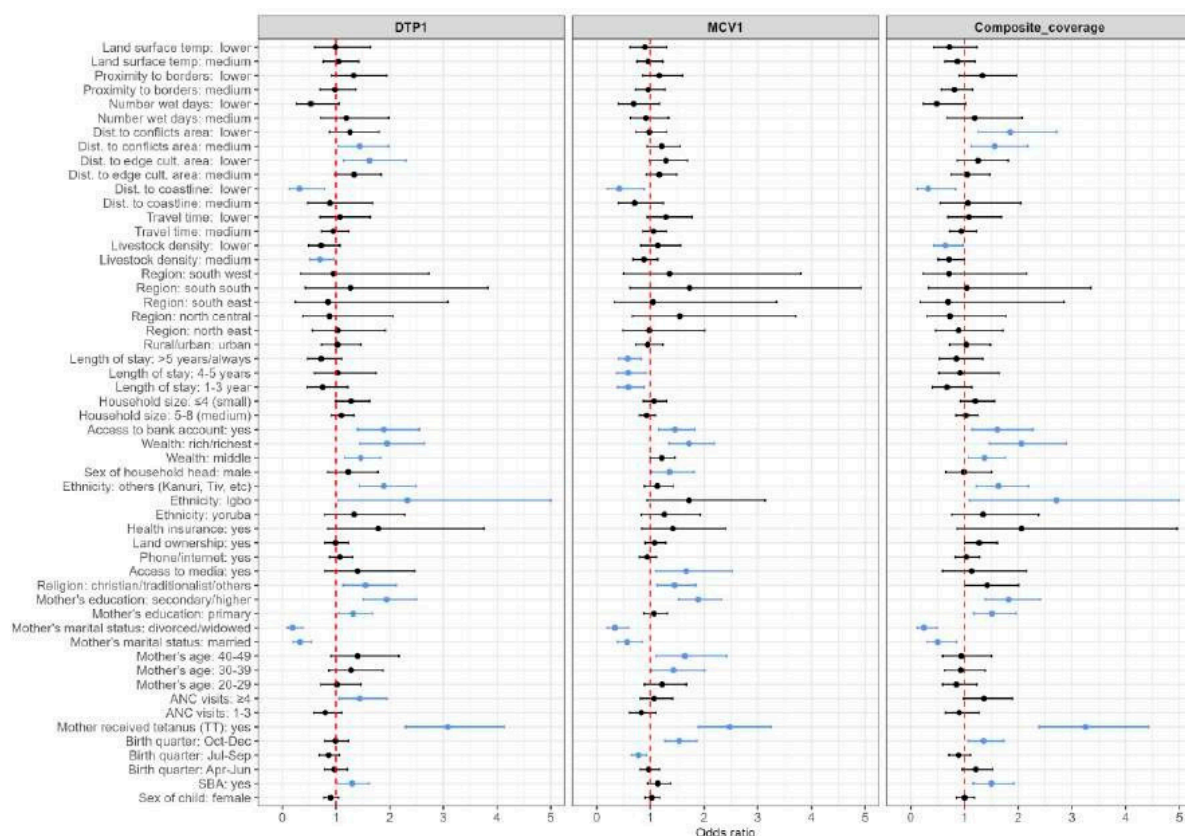

Figure S9: Risk factors associated with DTP1, MCV1, and composite coverage during the pandemic in 2021 (MICS-NICS) at the national level. The odds ratios and corresponding 95% credible intervals for significant risk factors are coloured in blue. Also, the upper limit for Igbo ethnicity is 5.21 for DTP1, and 6.77 for composite coverage.



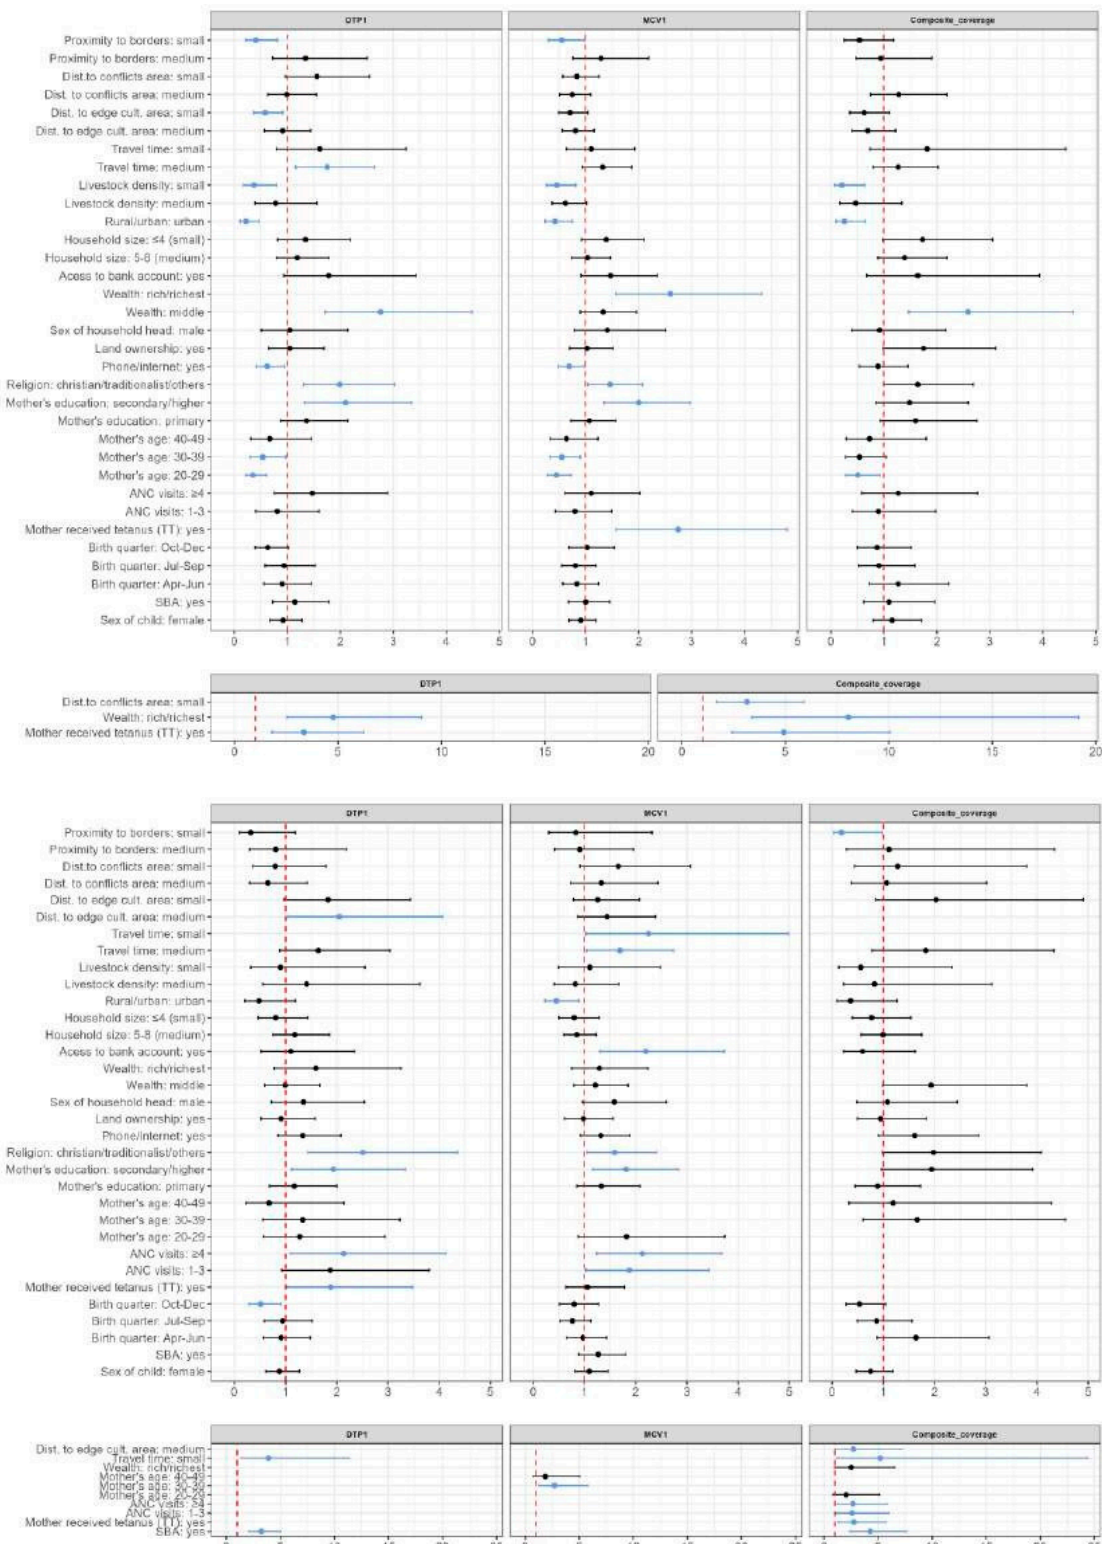

Figure S10: Risk factors associated with DTP1, MCV1, and composite coverage before and during the pandemic in 2018 (DHS - top panel) and 2021 (MICS-NICS - bottom panel) in the north central region. The odds ratios and corresponding 95% credible intervals for significant risk factors are coloured in blue.

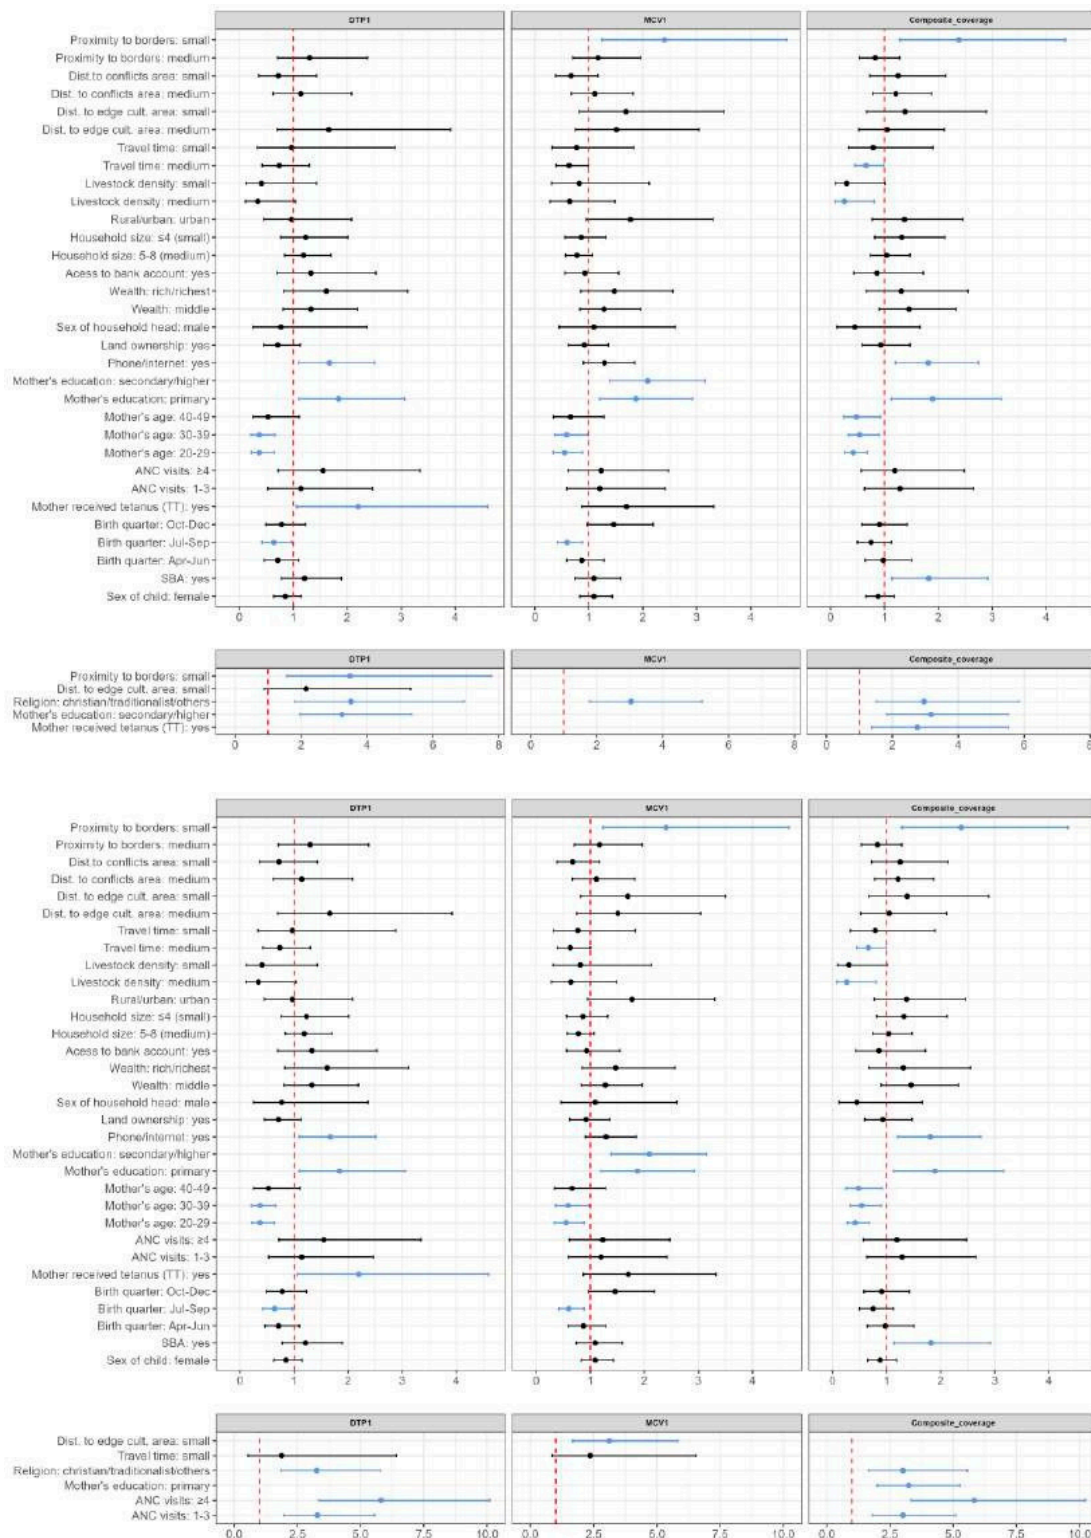

Figure S11: Risk factors associated with DTP1, MCV1, and composite coverage before and during the pandemic in 2018 (DHS - top panel) and 2021 (MICS-NICS - bottom panel) in the northeast region. The odds ratios and corresponding 95% credible intervals for significant risk factors are coloured in blue.

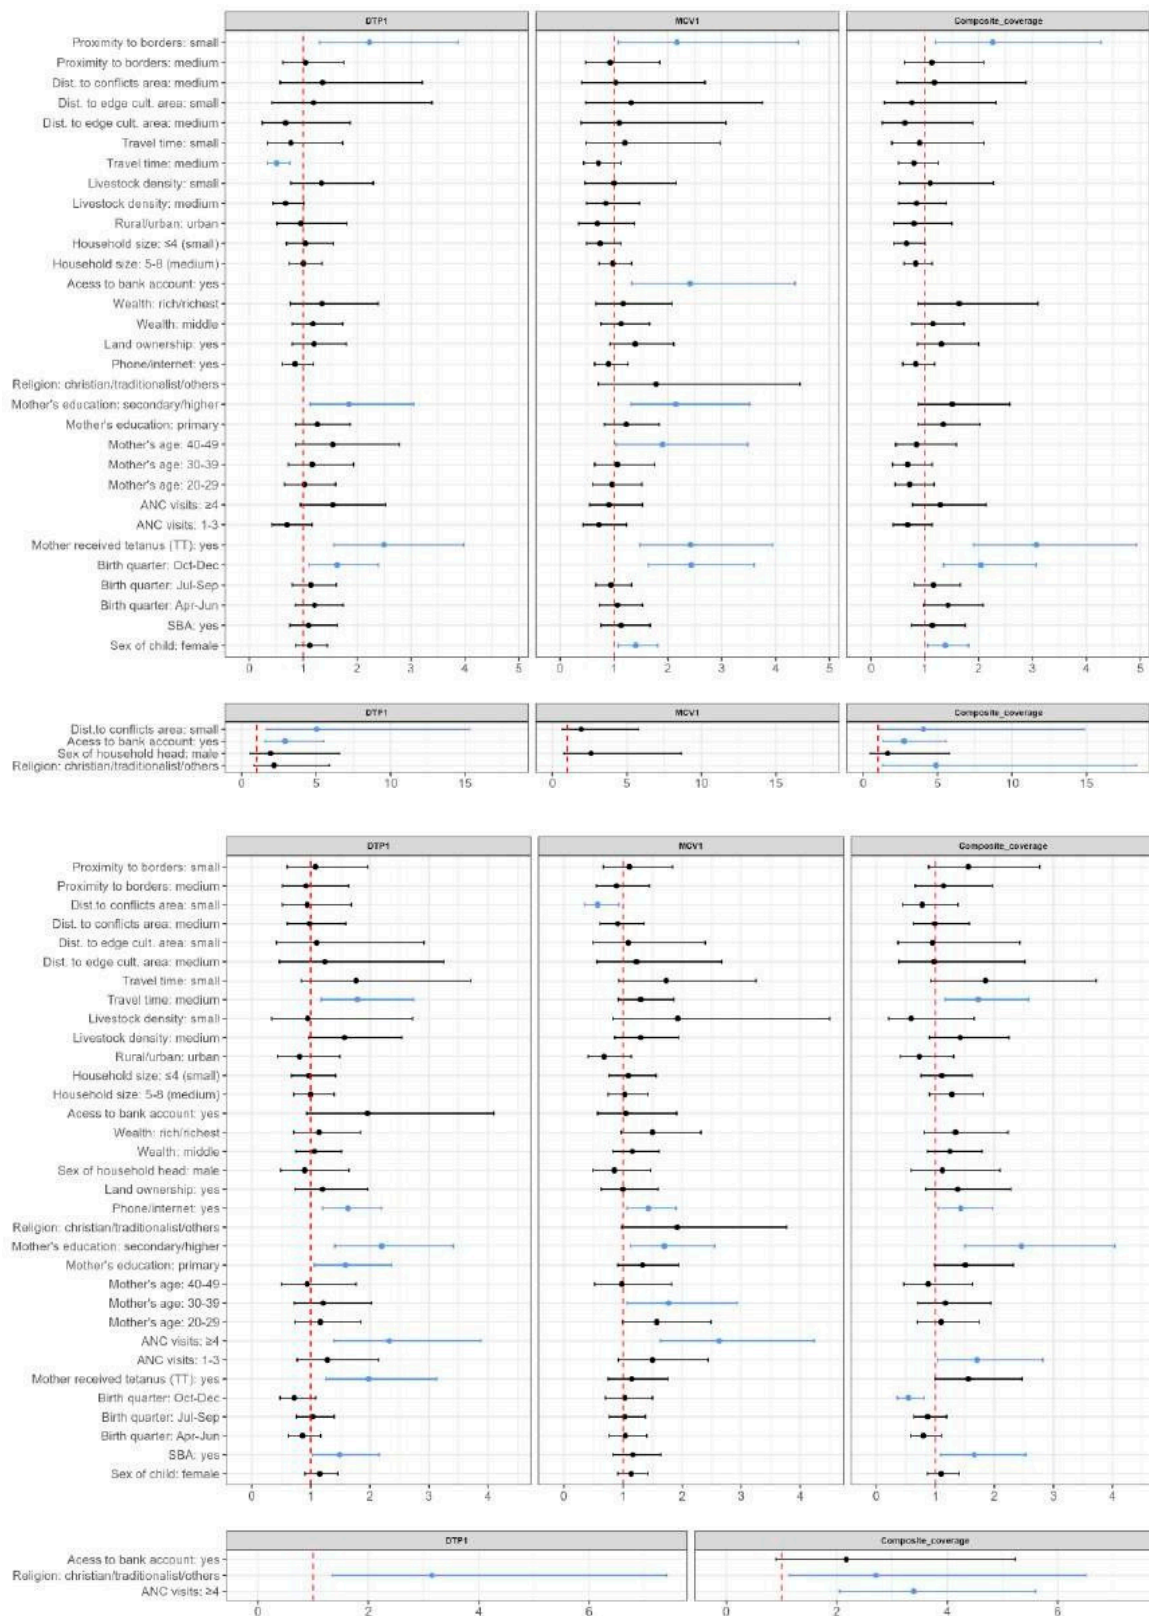

Figure S12: Risk factors associated with DTP1, MCV1, and composite coverage before and during the pandemic in 2018 (DHS - top panel) and 2021 (MICS-NICS - bottom panel) in the northwest region. The odds ratios and corresponding 95% credible intervals for significant risk factors are coloured in blue.



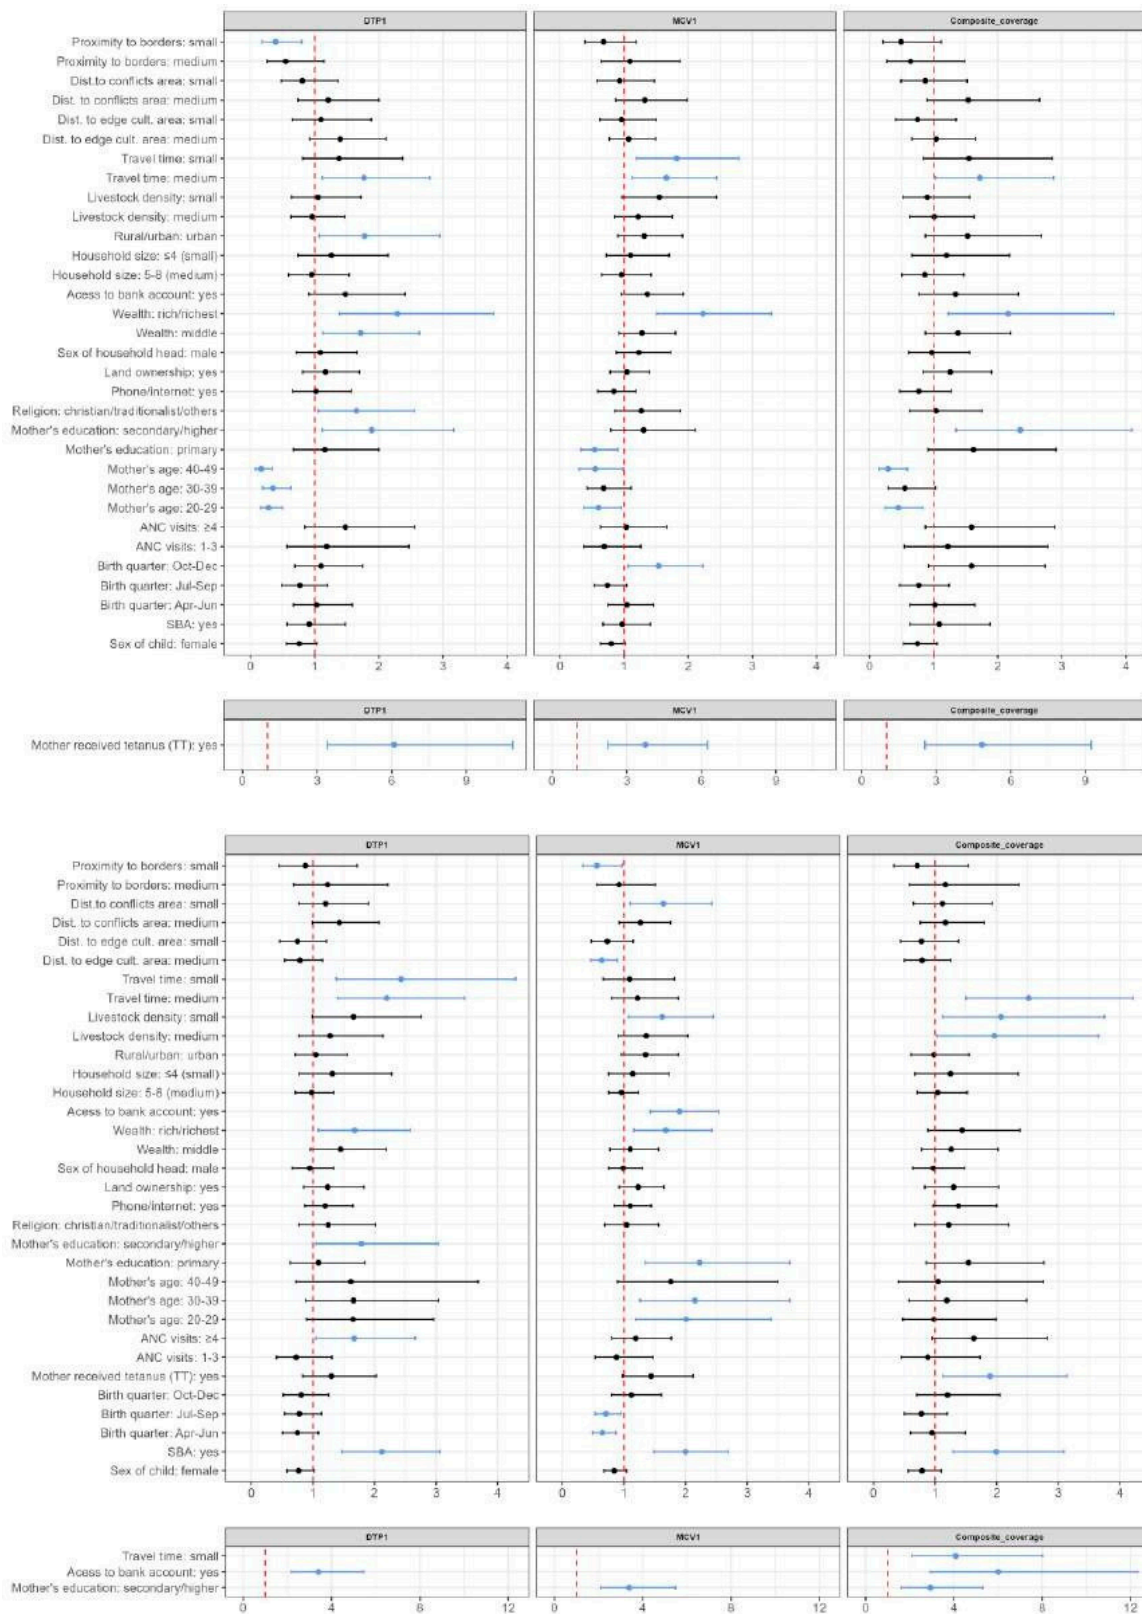

Figure S13: Risk factors associated with DTP1, MCV1, and composite coverage before and during the pandemic in 2018 (DHS - top panel) and 2021 (MICS-NICS - bottom panel) in the southern region. The odds ratios and corresponding 95% credible intervals for significant risk factors are coloured in blue.

Table S3: Distribution of sample characteristics of the study population by receipt of vaccine status for MICS-NICS 2021 and DHS 2018

| Characteristics                    | MICS 2021     |              |               |              |                      |              | DHS 2018      |              |               |              |                      |              |
|------------------------------------|---------------|--------------|---------------|--------------|----------------------|--------------|---------------|--------------|---------------|--------------|----------------------|--------------|
|                                    | Received DTP1 |              | Received MCV1 |              | Receipt of Zero dose |              | Received DTP1 |              | Received MCV1 |              | Receipt of Zero dose |              |
|                                    | No (%)        | Yes (%)      | No (%)        | Yes (%)      | No (%)               | Yes (%)      | No (%)        | Yes (%)      | No (%)        | Yes (%)      | No (%)               | Yes (%)      |
| <b>Total</b>                       | 1,581 (29.0)  | 3,878 (71.0) | 2,125 (38.9)  | 3,334 (61.1) | 4,334 (79.4)         | 1,125 (20.6) | 2,252 (35.2)  | 4,141 (64.8) | 2,982 (46.6)  | 3,411 (53.4) | 4,715 (73.8)         | 1,678 (26.2) |
| <b>Sex of child</b>                |               |              |               |              |                      |              |               |              |               |              |                      |              |
| Male                               | 794 (28.2)    | 2,024 (71.8) | 1,096 (38.9)  | 1,722 (61.1) | 2,243 (79.6)         | 575 (20.4)   | 1,164 (35.1)  | 2,151 (64.9) | 1,547 (46.7)  | 1,768 (53.3) | 2,435 (73.5)         | 880 (26.5)   |
| Female                             | 787 (29.8)    | 1,854 (70.2) | 1,029 (39.0)  | 1,612 (61.0) | 2,091 (79.2)         | 550 (20.8)   | 1,088 (35.3)  | 1,990 (64.7) | 1,435 (46.6)  | 1,643 (53.4) | 2,280 (74.1)         | 798 (25.9)   |
| <b>Skilled birth attendance</b>    |               |              |               |              |                      |              |               |              |               |              |                      |              |
| No                                 | 1,085 (44.0)  | 1,382 (56.0) | 1,282 (52.0)  | 1,185 (48.0) | 1,664 (67.5)         | 803 (32.5)   | 1,858 (53.4)  | 1,619 (46.6) | 2,162 (62.2)  | 1,315 (37.8) | 2,029 (58.4)         | 1,448 (41.6) |
| Yes                                | 300 (14.1)    | 1,832 (85.9) | 560 (26.3)    | 1,572 (73.7) | 1,959 (91.9)         | 173 (8.1)    | 394 (13.5)    | 2,522 (86.5) | 820 (28.1)    | 2,096 (71.9) | 2,686 (92.1)         | 230 (7.9)    |
| <b>Birth quarter</b>               |               |              |               |              |                      |              |               |              |               |              |                      |              |
| January - March                    | 373 (28.4)    | 941 (71.6)   | 514 (39.1)    | 800 (60.9)   | 1,036 (78.8)         | 278 (21.2)   | 660 (33.3)    | 1,323 (66.7) | 876 (44.2)    | 1,107 (55.8) | 1,506 (75.9)         | 477 (24.1)   |
| April - June                       | 407 (28.4)    | 1,027 (71.6) | 564 (39.3)    | 870 (60.7)   | 1,153 (80.4)         | 281 (19.6)   | 636 (35.9)    | 1,138 (64.1) | 840 (47.4)    | 934 (52.6)   | 1,313 (74.0)         | 461 (26.0)   |
| July - September                   | 460 (31.9)    | 982 (68.1)   | 645 (44.7)    | 797 (55.3)   | 1,098 (76.1)         | 344 (23.9)   | 645 (36.9)    | 1,104 (63.1) | 881 (50.4)    | 868 (49.6)   | 1,241 (71.0)         | 508 (29.0)   |
| October - December                 | 332 (26.4)    | 926 (73.6)   | 392 (31.2)    | 866 (68.8)   | 1,044 (83.0)         | 214 (17.0)   | 311 (35.1)    | 576 (64.9)   | 385 (43.4)    | 502 (56.6)   | 655 (73.8)           | 232 (26.2)   |
| <b>Mother received tetanus</b>     |               |              |               |              |                      |              |               |              |               |              |                      |              |
| No                                 | 901 (43.5)    | 1,171 (56.5) | 1,034 (49.9)  | 1,038 (50.1) | 1,376 (66.4)         | 696 (33.6)   | 1,214 (66.7)  | 606 (33.3)   | 1,316 (72.3)  | 504 (27.7)   | 808 (44.4)           | 1,012 (55.6) |
| Yes                                | 677 (20.0)    | 2,705 (80.0) | 1,088 (32.2)  | 2,294 (67.8) | 2,956 (87.4)         | 426 (12.6)   | 961 (22.6)    | 3,293 (77.4) | 1,544 (36.3)  | 2,710 (63.7) | 3,650 (85.8)         | 604 (14.2)   |
| <b>Number of ANC visit</b>         |               |              |               |              |                      |              |               |              |               |              |                      |              |
| None                               | 617 (59.2)    | 426 (40.8)   | 647 (62.0)    | 396 (38.0)   | 565 (54.2)           | 478 (45.8)   | 1,095 (69.4)  | 482 (30.6)   | 1,165 (73.9)  | 412 (26.1)   | 647 (41.0)           | 930 (59.0)   |
| 1-3                                | 290 (35.2)    | 534 (64.8)   | 373 (45.3)    | 451 (54.7)   | 634 (76.9)           | 190 (23.1)   | 419 (41.1)    | 601 (58.9)   | 545 (53.4)    | 475 (46.6)   | 733 (71.9)           | 287 (28.1)   |
| ≥4                                 | 442 (17.0)    | 2,153 (83.0) | 776 (29.9)    | 1,819 (70.1) | 2,310 (89.0)         | 285 (11.0)   | 661 (19.0)    | 2,816 (81.0) | 1,150 (33.1)  | 2,327 (66.9) | 3,078 (88.5)         | 399 (11.5)   |
| <b>Mother's age</b>                |               |              |               |              |                      |              |               |              |               |              |                      |              |
| 15-19                              | 98 (41.2)     | 140 (58.8)   | 129 (54.2)    | 109 (45.8)   | 169 (71.0)           | 69 (29.0)    | 188 (50.7)    | 183 (49.3)   | 248 (66.8)    | 123 (33.2)   | 220 (59.3)           | 151 (40.7)   |
| 20-29                              | 679 (31.4)    | 1,481 (68.6) | 893 (41.3)    | 1,267 (58.7) | 1,687 (78.1)         | 473 (21.9)   | 1,111 (34.8)  | 2,080 (65.2) | 1,490 (46.7)  | 1,701 (53.3) | 2,370 (74.3)         | 821 (25.7)   |
| 30-39                              | 449 (26.4)    | 1,254 (73.6) | 622 (36.5)    | 1,081 (63.5) | 1,386 (81.4)         | 317 (18.6)   | 744 (31.3)    | 1,636 (68.7) | 991 (41.6)    | 1,389 (58.4) | 1,836 (77.1)         | 544 (22.9)   |
| 40-49                              | 152 (31.9)    | 324 (68.1)   | 191 (40.1)    | 285 (59.9)   | 365 (76.7)           | 111 (23.3)   | 209 (46.3)    | 242 (53.7)   | 253 (56.1)    | 198 (43.9)   | 289 (64.1)           | 162 (35.9)   |
| <b>Mother's marital status</b>     |               |              |               |              |                      |              |               |              |               |              |                      |              |
| Never married/in union             | 14 (12.6)     | 97 (87.4)    | 31 (27.9)     | 80 (72.1)    | 97 (87.4)            | 14 (12.6)    | 40 (23.0)     | 134 (77.0)   | 63 (36.2)     | 111 (63.8)   | 151 (86.8)           | 23 (13.2)    |
| Married                            | 1,333 (30.7)  | 3,014 (69.3) | 1,752 (40.3)  | 2,595 (59.7) | 3,412 (78.5)         | 935 (21.5)   | 2,154 (35.6)  | 3,899 (64.4) | 2,849 (47.1)  | 3,204 (52.9) | 4,438 (73.3)         | 1,615 (26.7) |
| Formally married                   | 37 (26.8)     | 101 (73.2)   | 59 (42.8)     | 79 (57.2)    | 111 (80.4)           | 27 (19.6)    | 58 (34.9)     | 108 (65.1)   | 70 (42.2)     | 96 (57.8)    | 126 (75.9)           | 40 (24.1)    |
| <b>Mother's education</b>          |               |              |               |              |                      |              |               |              |               |              |                      |              |
| No education                       | 1,041 (47.4)  | 1,155 (52.6) | 1,187 (54.1)  | 1,009 (45.9) | 1,429 (65.1)         | 767 (34.9)   | 1,639 (60.0)  | 1,094 (40.0) | 1,826 (66.8)  | 907 (33.2)   | 1,442 (52.8)         | 1,291 (47.2) |
| Primary                            | 239 (27.2)    | 640 (72.8)   | 378 (43.0)    | 501 (57.0)   | 724 (82.4)           | 155 (17.6)   | 261 (28.3)    | 662 (71.7)   | 417 (45.2)    | 506 (54.8)   | 748 (81.0)           | 175 (19.0)   |
| Junior/secondary                   | 277 (14.4)    | 1,650 (85.6) | 506 (26.3)    | 1,421 (73.7) | 1,737 (90.1)         | 190 (9.9)    | 352 (12.9)    | 2,385 (87.1) | 739 (27.0)    | 1,998 (73.0) | 2,525 (92.3)         | 212 (7.7)    |
| Higher/tertiary                    | 23 (5.1)      | 432 (94.9)   | 53 (11.6)     | 402 (88.4)   | 443 (97.4)           | 12 (2.6)     | -             | -            | -             | -            | -                    | -            |
| <b>Mother's religion</b>           |               |              |               |              |                      |              |               |              |               |              |                      |              |
| Islam                              | 1,260 (38.7)  | 1,995 (61.3) | 1,550 (47.6)  | 1,705 (52.4) | 2,356 (72.4)         | 899 (27.6)   | 1,844 (49.9)  | 1,854 (50.1) | 2,149 (58.1)  | 1,549 (41.9) | 2,300 (62.2)         | 1,398 (37.8) |
| Christian/traditionalist/others    | 321 (14.6)    | 1,883 (85.4) | 575 (26.1)    | 1,629 (73.9) | 1,978 (89.7)         | 226 (10.3)   | 408 (15.1)    | 2,287 (84.9) | 833 (30.9)    | 1,862 (69.1) | 2,415 (89.6)         | 280 (10.4)   |
| <b>Access to media</b>             |               |              |               |              |                      |              |               |              |               |              |                      |              |
| No                                 | 1,358 (31.7)  | 2,923 (68.3) | 1,797 (42.0)  | 2,484 (58.0) | 3,325 (77.7)         | 956 (22.3)   | 1,748 (44.6)  | 2,174 (55.4) | 2,177 (55.5)  | 1,745 (44.5) | 2,574 (65.6)         | 1,348 (34.4) |
| Yes                                | 20 (6.9)      | 268 (93.1)   | 37 (12.8)     | 251 (87.2)   | 274 (95.1)           | 14 (4.9)     | 504 (20.4)    | 1,967 (79.6) | 805 (32.6)    | 1,666 (67.4) | 2,141 (86.6)         | 330 (13.4)   |
| <b>Mother use phone/internet</b>   |               |              |               |              |                      |              |               |              |               |              |                      |              |
| No                                 | 933 (41.1)    | 1,336 (58.9) | 1,119 (49.3)  | 1,150 (50.7) | 1,594 (70.3)         | 675 (29.7)   | 1,645 (51.3)  | 1,564 (48.7) | 1,949 (60.7)  | 1,260 (39.3) | 1,935 (60.3)         | 1,274 (39.7) |
| Yes                                | 439 (19.1)    | 1,856 (80.9) | 707 (30.8)    | 1,588 (69.2) | 2,006 (87.4)         | 289 (12.6)   | 607 (19.1)    | 2,577 (80.9) | 1,033 (32.4)  | 2,151 (67.6) | 2,780 (87.3)         | 404 (12.7)   |
| <b>Land ownership</b>              |               |              |               |              |                      |              |               |              |               |              |                      |              |
| No                                 | 339 (21.1)    | 1,270 (78.9) | 526 (32.7)    | 1,083 (67.3) | 1,358 (84.4)         | 251 (15.6)   | 2,036 (36.8)  | 3,492 (63.2) | 2,654 (48.0)  | 2,874 (52.0) | 4,006 (72.5)         | 1,522 (27.5) |
| Yes                                | 1,239 (32.2)  | 2,606 (67.8) | 1,596 (41.5)  | 2,249 (58.5) | 2,973 (77.3)         | 872 (22.7)   | 216 (25.0)    | 649 (75.0)   | 328 (37.9)    | 537 (62.1)   | 709 (82.0)           | 156 (18.0)   |
| <b>Mother had health insurance</b> |               |              |               |              |                      |              |               |              |               |              |                      |              |
| No                                 | 1,562 (29.4)  | 3,750 (70.6) | 2,093 (39.4)  | 3,219 (60.6) | 4,199 (79.0)         | 1,113 (21.0) | 2,232 (35.7)  | 4,024 (64.3) | 2,952 (47.2)  | 3,304 (52.8) | 4,593 (73.4)         | 1,663 (26.6) |
| Yes                                | 12 (9.2)      | 119 (90.8)   | 23 (17.6)     | 108 (82.4)   | 124 (94.7)           | 7 (5.3)      | 20 (14.6)     | 117 (85.4)   | 30 (21.9)     | 107 (78.1)   | 122 (89.1)           | 15 (10.9)    |

|                                    |              |              |              |              |              |              |              |              |              |              |              |              |
|------------------------------------|--------------|--------------|--------------|--------------|--------------|--------------|--------------|--------------|--------------|--------------|--------------|--------------|
| <b>Ethnicity</b>                   |              |              |              |              |              |              |              |              |              |              |              |              |
| Hausa                              | 989 (46.4)   | 1,142 (53.6) | 1,125 (52.8) | 1,006 (47.2) | 1,411 (66.2) | 720 (33.8)   | 1,423 (57.6) | 1,047 (42.4) | 1,590 (64.4) | 880 (35.6)   | 1,363 (55.2) | 1,107 (44.8) |
| Yoruba                             | 103 (17.4)   | 489 (82.6)   | 161 (27.2)   | 431 (72.8)   | 519 (87.7)   | 73 (12.3)    | 90 (14.0)    | 553 (86.0)   | 182 (28.3)   | 461 (71.7)   | 585 (91.0)   | 58 (9.0)     |
| Igbo                               | 48 (8.4)     | 525 (91.6)   | 111 (19.4)   | 462 (80.6)   | 543 (94.8)   | 30 (5.2)     | 69 (7.4)     | 869 (92.6)   | 228 (24.3)   | 710 (75.7)   | 891 (95.0)   | 47 (5.0)     |
| others (Kanuri, Tiv, etc)          | 441 (20.4)   | 1,722 (79.6) | 728 (33.7)   | 1,435 (66.3) | 1,861 (86.0) | 302 (14.0)   | 670 (28.6)   | 1,672 (71.4) | 982 (41.9)   | 1,360 (58.1) | 1,876 (80.1) | 466 (19.9)   |
| <b>Sex of household head</b>       |              |              |              |              |              |              |              |              |              |              |              |              |
| Female                             | 73 (19.9)    | 294 (80.1)   | 128 (34.9)   | 239 (65.1)   | 316 (86.1)   | 51 (13.9)    | 141 (21.0)   | 531 (79.0)   | 245 (36.5)   | 427 (63.5)   | 572 (85.1)   | 100 (14.9)   |
| Male                               | 1,508 (29.6) | 3,584 (70.4) | 1,997 (39.2) | 3,095 (60.8) | 4,018 (78.9) | 1,074 (21.1) | 2,111 (36.9) | 3,610 (63.1) | 2,737 (47.8) | 2,984 (52.2) | 4,143 (72.4) | 1,578 (27.6) |
| <b>Household wealth</b>            |              |              |              |              |              |              |              |              |              |              |              |              |
| Poorest/poor                       | 1,126 (39.9) | 1,696 (60.1) | 1,362 (48.3) | 1,460 (51.7) | 1,994 (70.7) | 828 (29.3)   | 1,553 (53.5) | 1,348 (46.5) | 1,830 (63.1) | 1,071 (36.9) | 1,686 (58.1) | 1,215 (41.9) |
| Middle                             | 265 (23.0)   | 886 (77.0)   | 425 (36.9)   | 726 (63.1)   | 970 (84.3)   | 181 (15.7)   | 395 (29.8)   | 929 (70.2)   | 579 (43.7)   | 745 (56.3)   | 1,057 (79.8) | 267 (20.2)   |
| Rich/richest                       | 190 (12.8)   | 1,296 (87.2) | 338 (22.7)   | 1,148 (77.3) | 1,370 (92.2) | 116 (7.8)    | 304 (14.0)   | 1,864 (86.0) | 573 (26.4)   | 1,595 (73.6) | 1,972 (91.0) | 196 (9.0)    |
| <b>Access to bank account</b>      |              |              |              |              |              |              |              |              |              |              |              |              |
| No                                 | 1,282 (36.4) | 2,238 (63.6) | 1,627 (46.2) | 1,893 (53.8) | 2,613 (74.2) | 907 (25.8)   | 2,182 (41.3) | 3,103 (58.7) | 2,792 (52.8) | 2,493 (47.2) | 3,643 (68.9) | 1,642 (31.1) |
| Yes                                | 96 (9.1)     | 961 (90.9)   | 208 (19.7)   | 849 (80.3)   | 994 (94.0)   | 63 (6.0)     | 70 (6.3)     | 1,038 (93.7) | 190 (17.1)   | 918 (82.9)   | 1,072 (96.8) | 36 (3.2)     |
| <b>Household size</b>              |              |              |              |              |              |              |              |              |              |              |              |              |
| ≥9 (large)                         | 592 (38.4)   | 951 (61.6)   | 708 (45.9)   | 835 (54.1)   | 1,123 (72.8) | 420 (27.2)   | 530 (28.2)   | 1,352 (71.8) | 777 (41.3)   | 1,105 (58.7) | 1,487 (79.0) | 395 (21.0)   |
| 5-8 (medium)                       | 689 (26.9)   | 1,872 (73.1) | 968 (37.8)   | 1,593 (62.2) | 2,068 (80.7) | 493 (19.3)   | 966 (32.8)   | 1,978 (67.2) | 1,325 (45.0) | 1,619 (55.0) | 2,234 (75.9) | 710 (24.1)   |
| ≤4 (small)                         | 300 (22.1)   | 1,055 (77.9) | 449 (33.1)   | 906 (66.9)   | 1,143 (84.4) | 212 (15.6)   | 756 (48.2)   | 811 (51.8)   | 880 (56.2)   | 687 (43.8)   | 994 (63.4)   | 573 (36.6)   |
| <b>Length of stay in household</b> |              |              |              |              |              |              |              |              |              |              |              |              |
| <1/visitor                         | 27 (17.2)    | 130 (82.8)   | 40 (25.5)    | 117 (74.5)   | 136 (86.6)   | 21 (13.4)    | 30 (16.0)    | 157 (84.0)   | 67 (35.8)    | 120 (64.2)   | 163 (87.2)   | 24 (12.8)    |
| 1-3 year                           | 112 (19.9)   | 452 (80.1)   | 182 (32.3)   | 382 (67.7)   | 478 (84.8)   | 86 (15.2)    | 187 (24.6)   | 574 (75.4)   | 276 (36.3)   | 485 (63.7)   | 630 (82.8)   | 131 (17.2)   |
| 4-5 years                          | 77 (20.0)    | 308 (80.0)   | 132 (34.3)   | 253 (65.7)   | 327 (84.9)   | 58 (15.1)    | 130 (27.7)   | 340 (72.3)   | 191 (40.6)   | 279 (59.4)   | 372 (79.1)   | 98 (20.9)    |
| >5 years/always                    | 1,155 (33.5) | 2,296 (66.5) | 1,474 (42.7) | 1,977 (57.3) | 2,650 (76.8) | 801 (23.2)   | 1,905 (38.3) | 3,070 (61.7) | 2,448 (49.2) | 2,527 (50.8) | 3,550 (71.4) | 1,425 (28.6) |
| <b>Rural/urban</b>                 |              |              |              |              |              |              |              |              |              |              |              |              |
| Rural                              | 1,279 (33.0) | 2,598 (67.0) | 1,649 (42.5) | 2,228 (57.5) | 2,949 (76.1) | 928 (23.9)   | 1,815 (43.6) | 2,351 (56.4) | 2,259 (54.2) | 1,907 (45.8) | 2,797 (67.1) | 1,369 (32.9) |
| Urban                              | 302 (19.1)   | 1,280 (80.9) | 476 (30.1)   | 1,106 (69.9) | 1,385 (87.5) | 197 (12.5)   | 437 (19.6)   | 1,790 (80.4) | 723 (32.5)   | 1,504 (67.5) | 1,918 (86.1) | 309 (13.9)   |
| <b>Region of residence</b>         |              |              |              |              |              |              |              |              |              |              |              |              |
| North west                         | 634 (44.6)   | 787 (55.4)   | 738 (51.9)   | 683 (48.1)   | 965 (67.9)   | 456 (32.1)   | 1,000 (56.6) | 766 (43.4)   | 1,088 (61.6) | 678 (38.4)   | 1,020 (57.8) | 746 (42.2)   |
| North east                         | 443 (35.3)   | 813 (64.7)   | 581 (46.3)   | 675 (53.7)   | 934 (74.4)   | 322 (25.6)   | 659 (47.8)   | 720 (52.2)   | 809 (58.7)   | 570 (41.3)   | 854 (61.9)   | 525 (38.1)   |
| North central                      | 264 (23.5)   | 859 (76.5)   | 373 (33.2)   | 750 (66.8)   | 953 (84.9)   | 170 (15.1)   | 301 (27.2)   | 805 (72.8)   | 472 (42.7)   | 634 (57.3)   | 896 (81.0)   | 210 (19.0)   |
| South east                         | 39 (8.6)     | 417 (91.4)   | 96 (21.1)    | 360 (78.9)   | 432 (94.7)   | 24 (5.3)     | 65 (8.4)     | 705 (91.6)   | 208 (27.0)   | 562 (73.0)   | 726 (94.3)   | 44 (5.7)     |
| South south                        | 89 (15.3)    | 491 (84.7)   | 158 (27.2)   | 422 (72.8)   | 511 (88.1)   | 69 (11.9)    | 130 (18.9)   | 559 (81.1)   | 215 (31.2)   | 474 (68.8)   | 598 (86.8)   | 91 (13.2)    |
| South west                         | 112 (18.0)   | 511 (82.0)   | 179 (28.7)   | 444 (71.3)   | 539 (86.5)   | 84 (13.5)    | 97 (14.2)    | 586 (85.8)   | 190 (27.8)   | 493 (72.2)   | 621 (90.9)   | 62 (9.1)     |
| <b>Livestock density index</b>     |              |              |              |              |              |              |              |              |              |              |              |              |
| Higher                             | 413 (24.4)   | 1,279 (75.6) | 597 (35.3)   | 1,095 (64.7) | 1,399 (82.7) | 293 (17.3)   | 1,034 (41.4) | 1,465 (58.6) | 1,284 (51.4) | 1,215 (48.6) | 1,727 (69.1) | 772 (30.9)   |
| Medium                             | 526 (29.8)   | 1,242 (70.2) | 717 (40.6)   | 1,051 (59.4) | 1,406 (79.5) | 362 (20.5)   | 743 (34.6)   | 1,405 (65.4) | 1,025 (47.7) | 1,123 (52.3) | 1,598 (74.4) | 550 (25.6)   |
| Small                              | 642 (32.1)   | 1,357 (67.9) | 811 (40.6)   | 1,188 (59.4) | 1,529 (76.5) | 470 (23.5)   | 475 (27.2)   | 1,271 (72.8) | 673 (38.5)   | 1,073 (61.5) | 1,390 (79.6) | 356 (20.4)   |
| <b>Travel time</b>                 |              |              |              |              |              |              |              |              |              |              |              |              |
| Higher                             | 799 (36.0)   | 1,422 (64.0) | 981 (44.2)   | 1,240 (55.8) | 1,647 (74.2) | 574 (25.8)   | 1,297 (51.3) | 1,233 (48.7) | 1,523 (60.2) | 1,007 (39.8) | 1,518 (60.0) | 1,012 (40.0) |
| Medium                             | 558 (29.9)   | 1,310 (70.1) | 758 (40.6)   | 1,110 (59.4) | 1,459 (78.1) | 409 (21.9)   | 648 (31.4)   | 1,416 (68.6) | 917 (44.4)   | 1,147 (55.6) | 1,606 (77.8) | 458 (22.2)   |
| Small                              | 224 (16.4)   | 1,146 (83.6) | 386 (28.2)   | 984 (71.8)   | 1,228 (89.6) | 142 (10.4)   | 307 (17.1)   | 1,492 (82.9) | 542 (30.1)   | 1,257 (69.9) | 1,591 (88.4) | 208 (11.6)   |
| <b>Distance to Coastline</b>       |              |              |              |              |              |              |              |              |              |              |              |              |
| Higher                             | 1,085 (39.7) | 1,648 (60.3) | 1,334 (48.8) | 1,399 (51.2) | 1,948 (71.3) | 785 (28.7)   | 1,566 (53.9) | 1,339 (46.1) | 1,751 (60.3) | 1,154 (39.7) | 1,703 (58.6) | 1,202 (41.4) |
| Medium                             | 306 (19.4)   | 1,268 (80.6) | 471 (29.9)   | 1,103 (70.1) | 1,380 (87.7) | 194 (12.3)   | 460 (23.3)   | 1,515 (76.7) | 802 (40.6)   | 1,173 (59.4) | 1,655 (83.8) | 320 (16.2)   |
| Small                              | 190 (16.5)   | 962 (83.5)   | 320 (27.8)   | 832 (72.2)   | 1,006 (87.3) | 146 (12.7)   | 226 (14.9)   | 1,287 (85.1) | 429 (28.4)   | 1,084 (71.6) | 1,357 (89.7) | 156 (10.3)   |
| <b>Distance to edge cult. Area</b> |              |              |              |              |              |              |              |              |              |              |              |              |
| Higher                             | 273 (20.4)   | 1,067 (79.6) | 415 (31.0)   | 925 (69.0)   | 1,160 (86.6) | 180 (13.4)   | 362 (22.0)   | 1,285 (78.0) | 557 (33.8)   | 1,090 (66.2) | 1,382 (83.9) | 265 (16.1)   |
| Medium                             | 369 (22.8)   | 1,249 (77.2) | 533 (32.9)   | 1,085 (67.1) | 1,355 (83.7) | 263 (16.3)   | 517 (26.9)   | 1,404 (73.1) | 798 (41.5)   | 1,123 (58.5) | 1,557 (81.1) | 364 (18.9)   |
| Small                              | 939 (37.5)   | 1,562 (62.5) | 1,177 (47.1) | 1,324 (52.9) | 1,819 (72.7) | 682 (27.3)   | 1,373 (48.6) | 1,452 (51.4) | 1,627 (57.6) | 1,198 (42.4) | 1,776 (62.9) | 1,049 (37.1) |
| <b>Distance to conflict area</b>   |              |              |              |              |              |              |              |              |              |              |              |              |
| Higher                             | 987 (40.6)   | 1,444 (59.4) | 1,147 (47.2) | 1,284 (52.8) | 1,701 (70.0) | 730 (30.0)   | 1,032 (44.8) | 1,270 (55.2) | 1,257 (54.6) | 1,045 (45.4) | 1,524 (66.2) | 778 (33.8)   |
| Medium                             | 288 (19.6)   | 1,181 (80.4) | 460 (31.3)   | 1,009 (68.7) | 1,266 (86.2) | 203 (13.8)   | 681 (31.7)   | 1,467 (68.3) | 991 (46.1)   | 1,157 (53.9) | 1,643 (76.5) | 505 (23.5)   |
| Small                              | 306 (19.6)   | 1,253 (80.4) | 518 (33.2)   | 1,041 (66.8) | 1,367 (87.7) | 192 (12.3)   | 539 (27.7)   | 1,404 (72.3) | 734 (37.8)   | 1,209 (62.2) | 1,548 (79.7) | 395 (20.3)   |
| <b>Number wet days</b>             |              |              |              |              |              |              |              |              |              |              |              |              |
| Higher                             | 186 (15.6)   | 1,007 (84.4) | 309 (25.9)   | 884 (74.1)   | 1,054 (88.3) | 139 (11.7)   | 218 (13.9)   | 1,353 (86.1) | 461 (29.3)   | 1,110 (70.7) | 1,417 (90.2) | 154 (9.8)    |

|                                          |              |              |              |              |              |            |              |              |              |              |              |              |
|------------------------------------------|--------------|--------------|--------------|--------------|--------------|------------|--------------|--------------|--------------|--------------|--------------|--------------|
| <b>Medium</b>                            | 261 (17.3)   | 1,248 (82.7) | 436 (28.9)   | 1,073 (71.1) | 1,343 (89.0) | 166 (11.0) | 439 (23.7)   | 1,413 (76.3) | 731 (39.5)   | 1,121 (60.5) | 1,550 (83.7) | 302 (16.3)   |
| <b>Small</b>                             | 1,134 (41.1) | 1,623 (58.9) | 1,380 (50.1) | 1,377 (49.9) | 1,937 (70.3) | 820 (29.7) | 1,595 (53.7) | 1,375 (46.3) | 1,790 (60.3) | 1,180 (39.7) | 1,748 (58.9) | 1,222 (41.1) |
| <b>Proximity to national borders</b>     |              |              |              |              |              |            |              |              |              |              |              |              |
| <b>Higher</b>                            | 569 (28.4)   | 1,431 (71.5) | 783 (39.1)   | 1,217 (60.9) | 1,605 (80.3) | 395 (19.8) | 761 (34.6)   | 1,438 (65.4) | 1,047 (47.6) | 1,152 (52.4) | 1,612 (73.3) | 587 (26.7)   |
| <b>Medium</b>                            | 540 (31.5)   | 1,177 (68.5) | 729 (42.5)   | 988 (57.5)   | 1,318 (76.8) | 399 (23.2) | 809 (36.0)   | 1,436 (64.0) | 1,058 (47.1) | 1,187 (52.9) | 1,648 (73.4) | 597 (26.6)   |
| <b>Small</b>                             | 472 (27.1)   | 1,270 (72.9) | 613 (35.2)   | 1,129 (64.8) | 1,411 (81.0) | 331 (19.0) | 682 (35.0)   | 1,267 (65.0) | 877 (45.0)   | 1,072 (55.0) | 1,455 (74.7) | 494 (25.3)   |
| <b>Land surface day time temperature</b> |              |              |              |              |              |            |              |              |              |              |              |              |
| <b>Higher</b>                            | 933 (37.5)   | 1,554 (62.5) | 1,143 (46.0) | 1,344 (54.0) | 1,832 (73.7) | 655 (26.3) | 1,520 (52.5) | 1,373 (47.5) | 1,715 (59.3) | 1,178 (40.7) | 1,730 (59.8) | 1,163 (40.2) |
| <b>Medium</b>                            | 450 (25.6)   | 1,307 (74.4) | 642 (36.5)   | 1,115 (63.5) | 1,437 (81.8) | 320 (18.2) | 488 (24.5)   | 1,501 (75.5) | 813 (40.9)   | 1,176 (59.1) | 1,648 (82.9) | 341 (17.1)   |
| <b>Small</b>                             | 198 (16.3)   | 1,017 (83.7) | 340 (28.0)   | 875 (72.0)   | 1,065 (87.7) | 150 (12.3) | 244 (16.1)   | 1,267 (83.9) | 454 (30.0)   | 1,057 (70.0) | 1,337 (88.5) | 174 (11.5)   |

Table S4: Factors associated with DTP1, MCV1 and composite coverage by region for DHS 2018 using multilevel binary logistic regression models

| Characteristic                    | DHS                   |                       |                            |                        |                       |                            |                       |                       |                            |                       |                       |                            |
|-----------------------------------|-----------------------|-----------------------|----------------------------|------------------------|-----------------------|----------------------------|-----------------------|-----------------------|----------------------------|-----------------------|-----------------------|----------------------------|
|                                   | North Central         |                       |                            | North East             |                       |                            | North West            |                       |                            | South                 |                       |                            |
|                                   | Receive<br>d<br>DTP1  | Receive<br>d<br>MCV1  | Receipt of<br>Zero<br>dose | Receive<br>d<br>DTP1   | Receive<br>d<br>MCV1  | Receipt of<br>Zero<br>dose | Receive<br>d<br>DTP1  | Receive<br>d<br>MCV1  | Receipt of<br>Zero<br>dose | Receive<br>d<br>DTP1  | Receive<br>d<br>MCV1  | Receipt of<br>Zero<br>dose |
|                                   | OR<br>(95%)           | OR<br>(95%)           | OR<br>(95%)                | OR<br>(95%)            | OR<br>(95%)           | OR<br>(95%)                | OR<br>(95%)           | OR<br>(95%)           | OR<br>(95%)                | OR<br>(95%)           | OR<br>(95%)           | OR<br>(95%)                |
| Sex of child: female              | 0.86<br>(0.58-1.26)   | 1.08<br>(0.80-1.45)   | 1.32<br>(0.83-2.09)        | 1.10<br>(0.83-1.45)    | 1.11<br>(0.86-1.45)   | 0.85<br>(0.64-1.13)        | 1.15<br>(0.90-1.46)   | 1.14<br>(0.91-1.42)   | 0.91<br>(0.71-1.15)        | 0.77<br>(0.58-1.02)   | 0.84<br>(0.67-1.04)   | 1.27<br>(0.90-1.77)        |
| SBA:                              | 3.53<br>(2.22-5.70) * | 1.27<br>(0.89-1.81)   | 0.24<br>(0.13-0.42) *      | 2.31<br>(1.58-3.40) *  | 2.15<br>(1.54-3.03) * | 0.35<br>(0.23-0.53) *      | 1.49<br>(1.03-2.17) * | 1.17<br>(0.83-1.64)   | 0.60<br>(0.39-0.91) *      | 2.12<br>(1.47-3.06) * | 2.01<br>(1.49-2.71) * | 0.50<br>(0.32-0.78) *      |
| Birth quarter: Apr-Jun            | 0.91<br>(0.55-1.50)   | 0.96<br>(0.65-1.42)   | 0.62<br>(0.33-1.14)        | 0.88<br>(0.61-1.26)    | 0.88<br>(0.63-1.24)   | 1.20<br>(0.83-1.74)        | 0.86<br>(0.62-1.17)   | 1.04<br>(0.77-1.40)   | 1.26<br>(0.91-1.73)        | 0.75<br>(0.51-1.09)   | 0.65<br>(0.49-0.87) * | 1.06<br>(0.67-1.66)        |
| Birth quarter: Jul-               | 0.93<br>(0.57-1.52)   | 0.76<br>(0.52-1.12)   | 1.15<br>(0.64-2.05)        | 0.72<br>(0.50-1.03)    | 0.82<br>(0.58-1.15)   | 1.57<br>(1.08-2.27) *      | 1.03<br>(0.76-1.40)   | 1.03<br>(0.77-1.38)   | 1.14<br>(0.84-1.56)        | 0.78<br>(0.54-1.14)   | 0.71<br>(0.53-0.95) * | 1.28<br>(0.83-1.99)        |
| Birth quarter: Oct-Dec            | 0.48<br>(0.26-0.86) * | 0.81<br>(0.51-1.29)   | 1.89<br>(0.96-3.71)        | 0.88<br>(0.55-1.39)    | 1.29<br>(0.84-1.97)   | 1.04<br>(0.64-1.67)        | 0.72<br>(0.48-1.08)   | 1.03<br>(0.70-1.50)   | 1.86<br>(1.24-2.78) *      | 0.81<br>(0.52-1.26)   | 1.12<br>(0.79-1.61)   | 0.84<br>(0.49-1.43)        |
| Mother received tetanus           | 1.94<br>(1.02-3.68) * | 1.08<br>(0.65-1.81)   | 0.36<br>(0.17-0.74) *      | 0.97<br>(0.61-1.52)    | 1.80<br>(1.15-2.83) * | 0.96<br>(0.60-1.55)        | 1.99<br>(1.26-3.14) * | 1.15<br>(0.75-1.76)   | 0.64<br>(0.40-1.01)        | 1.30<br>(0.83-2.03)   | 1.44<br>(0.98-2.12)   | 0.53<br>(0.32-0.88) *      |
| ANC visits: 1-3                   | 1.92<br>(0.92-4.05)   | 1.86<br>(1.02-3.40) * | 0.39<br>(0.17-0.88) *      | 3.31<br>(1.97-5.60) *  | 1.38<br>(0.82-2.32)   | 0.33<br>(0.19-0.55) *      | 1.29<br>(0.77-2.15)   | 1.50<br>(0.92-2.44)   | 0.58<br>(0.35-0.96) *      | 0.73<br>(0.41-1.31)   | 0.88<br>(0.53-1.48)   | 1.14<br>(0.58-2.22)        |
| ANC visits:                       | 2.20<br>(1.10-4.43) * | 2.11<br>(1.22-3.64) * | 0.38<br>(0.17-0.81) *      | 5.84<br>(3.38-10.20) * | 2.29<br>(1.35-3.90) * | 0.17<br>(0.10-0.30) *      | 2.35<br>(1.41-3.90) * | 2.63<br>(1.63-4.26) * | 0.29<br>(0.18-0.48) *      | 1.67<br>(1.05-2.66) * | 1.19<br>(0.80-1.78)   | 0.61<br>(0.35-1.05)        |
| Mother's age: 20-29               | 1.27<br>(0.54-3.01)   | 1.76<br>(0.86-3.68)   | 0.49<br>(0.20-1.23)        | 0.98<br>(0.55-1.74)    | 1.66<br>(0.96-2.93)   | 0.60<br>(0.34-1.06)        | 1.16<br>(0.73-1.86)   | 1.56<br>(0.99-2.50)   | 0.91<br>(0.57-1.45)        | 1.65<br>(0.90-2.96)   | 2.02<br>(1.19-3.41) * | 1.00<br>(0.50-2.08)        |
| Mother's age:                     | 1.32<br>(0.52-3.31)   | 2.59<br>(1.21-5.63) * | 0.60<br>(0.22-1.65)        | 1.15<br>(0.61-2.15)    | 2.09<br>(1.15-3.89) * | 0.54<br>(0.29-1.01)        | 1.21<br>(0.72-2.03)   | 1.76<br>(1.07-2.94) * | 0.86<br>(0.51-1.43)        | 1.66<br>(0.89-3.04)   | 2.17<br>(1.26-3.72) * | 0.82<br>(0.40-1.76)        |
| Mother's age: 40-49               | 0.67<br>(0.20-2.19)   | 1.82<br>(0.68-4.91)   | 0.85<br>(0.24-3.06)        | 0.54<br>(0.24-1.19)    | 1.46<br>(0.68-3.13)   | 1.02<br>(0.46-2.24)        | 0.94<br>(0.50-1.77)   | 0.98<br>(0.52-1.82)   | 1.14<br>(0.61-2.12)        | 1.62<br>(0.72-3.68)   | 1.76<br>(0.89-3.51)   | 0.96<br>(0.36-2.52)        |
| Mother's education:               | 1.11<br>(0.63-1.94)   | 1.33<br>(0.85-2.08)   | 1.10<br>(0.57-2.13)        | 2.25<br>(1.45-3.52) *  | 1.68<br>(1.11-2.53) * | 0.31<br>(0.19-0.50) *      | 1.59<br>(1.07-2.38) * | 1.33<br>(0.91-1.94)   | 0.66<br>(0.43-1.02)        | 1.09<br>(0.63-1.85)   | 2.24<br>(1.36-3.72) * | 0.65<br>(0.36-1.17)        |
| Mother's education: junior/higher | 1.96<br>(1.11-3.48) * | 1.82<br>(1.17-2.85) * | 0.51<br>(0.25-1.03)        | 2.28<br>(1.38-3.81) *  | 1.39<br>(0.89-2.17)   | 0.45<br>(0.26-0.78) *      | 2.20<br>(1.42-3.43) * | 1.70<br>(1.13-2.56) * | 0.41<br>(0.25-0.67) *      | 1.79<br>(1.05-3.03) * | 3.40<br>(2.10-5.54) * | 0.34<br>(0.19-0.62) *      |
| Religion:                         | 2.63<br>(1.43-4.93) * | 1.50<br>(0.97-2.32)   | 0.50<br>(0.25-1.02)        | 3.28<br>(1.87-5.86) *  | 1.80<br>(1.12-2.93) * | 0.33<br>(0.18-0.60) *      | 3.14<br>(1.36-7.54) * | 1.92<br>(0.98-3.79)   | 0.38<br>(0.15-0.87) *      | 1.25<br>(0.77-2.02)   | 1.04<br>(0.69-1.56)   | 0.82<br>(0.46-1.49)        |
| Christian/traditionalist/ot       | 1.38<br>(0.87-2.19)   | 1.34<br>(0.93-1.92)   | 0.63<br>(0.36-1.11)        | 1.15<br>(0.82-1.63)    | 1.12<br>(0.81-1.54)   | 0.82<br>(0.57-1.18)        | 1.63<br>(1.21-2.21) * | 1.43<br>(1.07-1.91) * | 0.70<br>(0.51-0.96) *      | 1.20<br>(0.87-1.65)   | 1.10<br>(0.84-1.44)   | 0.72<br>(0.50-1.04)        |
| Phone/internet: yes               | 0.87<br>(0.49-1.56)   | 1.01<br>(0.63-1.63)   | 1.04<br>(0.53-2.00)        | 0.85<br>(0.51-1.41)    | 1.25<br>(0.79-1.99)   | 1.18<br>(0.70-1.99)        | 1.20<br>(0.73-1.97)   | 1.00<br>(0.63-1.59)   | 0.73<br>(0.44-1.19)        | 1.24<br>(0.85-1.83)   | 1.23<br>(0.92-1.66)   | 0.77<br>(0.49-1.20)        |
| Land ownership:                   | 1.47<br>(0.75-2.85)   | 1.46<br>(0.86-2.46)   | 0.92<br>(0.42-2.10)        | 0.84<br>(0.39-1.78)    | 0.87<br>(0.44-1.73)   | 0.92<br>(0.43-2.05)        | 0.90<br>(0.49-1.65)   | 0.85<br>(0.49-1.47)   | 0.89<br>(0.48-1.69)        | 0.95<br>(0.66-1.34)   | 0.99<br>(0.75-1.30)   | 1.02<br>(0.68-1.56)        |
| Sex of household head: male       | 1.02<br>(0.59-1.77)   | 1.23<br>(0.80-1.90)   | 0.52<br>(0.27-1.00)        | 1.29<br>(0.83-2.01)    | 1.65<br>(1.10-2.47) * | 0.79<br>(0.50-1.26)        | 1.07<br>(0.75-1.52)   | 1.16<br>(0.83-1.61)   | 0.80<br>(0.56-1.15)        | 1.45<br>(0.96-2.19)   | 1.10<br>(0.77-1.56)   | 0.79<br>(0.49-1.27)        |
| Wealth:                           | 1.66<br>(0.79-3.56)   | 1.26<br>(0.73-2.19)   | 0.40<br>(0.15-1.01)        | 2.14<br>(1.12-4.13) *  | 2.17<br>(1.21-3.92) * | 0.62<br>(0.31-1.23)        | 1.14<br>(0.71-1.84)   | 1.50<br>(0.97-2.32)   | 0.75<br>(0.45-1.24)        | 1.68<br>(1.09-2.58) * | 1.68<br>(1.16-2.44) * | 0.69<br>(0.42-1.14)        |
| Wealth: rich/richest              | 1.03<br>(0.48-2.29)   | 2.19<br>(1.30-3.74) * | 1.70<br>(0.61-4.54)        | 1.40<br>(0.64-3.18)    | 1.90<br>(0.98-3.74)   | 0.62<br>(0.24-1.51)        | 1.93<br>(0.94-4.14)   | 1.04<br>(0.57-1.91)   | 0.48<br>(0.19-1.11)        | 3.40<br>(2.17-5.46) * | 1.90<br>(1.43-2.54) * | 0.17<br>(0.08-0.34) *      |
| Access to bank                    | 1.19<br>(0.74-1.91)   | 0.87<br>(0.60-1.24)   | 1.01<br>(0.57-1.78)        | 0.68<br>(0.46-1.01)    | 0.85<br>(0.59-1.23)   | 1.32<br>(0.88-1.99)        | 1.00<br>(0.71-1.41)   | 1.03<br>(0.75-1.43)   | 0.78<br>(0.55-1.11)        | 0.98<br>(0.71-1.34)   | 0.96<br>(0.75-1.24)   | 0.96<br>(0.66-1.40)        |
| Household size: 5-8 (medium)      | 0.78<br>(0.43-1.41)   | 0.80<br>(0.50-1.30)   | 1.29<br>(0.65-2.58)        | 1.08<br>(0.70-1.68)    | 1.03<br>(0.69-1.56)   | 0.83<br>(0.53-1.30)        | 0.97<br>(0.67-1.42)   | 1.09<br>(0.76-1.56)   | 0.90<br>(0.62-1.32)        | 1.32<br>(0.78-2.28)   | 1.14<br>(0.75-1.73)   | 0.81<br>(0.42-1.50)        |
| Household size: ≤4                |                       |                       |                            |                        |                       |                            |                       |                       |                            |                       |                       |                            |

|                                        |                        |                       |                        |                     |                       |                     |                       |                       |                       |                       |                       |                       |
|----------------------------------------|------------------------|-----------------------|------------------------|---------------------|-----------------------|---------------------|-----------------------|-----------------------|-----------------------|-----------------------|-----------------------|-----------------------|
| <b>Rural/urban: urban</b>              | 0.46<br>(0.16-1.29)    | 0.42<br>(0.21-0.83) * | 2.85<br>(0.81-10.20)   | 0.43<br>(0.15-1.23) | 0.50<br>(0.20-1.20)   | 2.51<br>(0.88-7.23) | 0.81<br>(0.44-1.50)   | 0.68<br>(0.41-1.14)   | 1.37<br>(0.76-2.45)   | 1.05<br>(0.71-1.56)   | 1.35<br>(0.96-1.89)   | 1.02<br>(0.64-1.63)   |
| <b>Livestock density:</b>              | 1.50<br>(0.50-4.52)    | 0.89<br>(0.42-1.96)   | 1.17<br>(0.32-4.41)    | 1.50<br>(0.86-2.62) | 1.21<br>(0.77-1.92)   | 0.74<br>(0.43-1.27) | 1.57<br>(0.97-2.56)   | 1.29<br>(0.86-1.95)   | 0.70<br>(0.44-1.12)   | 1.28<br>(0.77-2.14)   | 1.36<br>(0.91-2.05)   | 0.51<br>(0.27-0.97) * |
| <b>Livestock density: lower</b>        | 0.90<br>(0.26-3.04)    | 1.08<br>(0.46-2.51)   | 1.76<br>(0.43-7.50)    | 1.80<br>(0.90-3.60) | 2.17<br>(1.22-3.87) * | 0.57<br>(0.29-1.11) | 0.95<br>(0.33-2.74)   | 1.93<br>(0.83-4.52)   | 1.69<br>(0.60-4.74)   | 1.66<br>(0.99-2.76)   | 1.62<br>(1.07-2.46) * | 0.48<br>(0.27-0.89) * |
| <b>Travel time:</b>                    | 1.73<br>(0.86-3.53)    | 1.70<br>(1.06-2.74) * | 0.54<br>(0.23-1.24)    | 1.53<br>(0.84-2.83) | 1.65<br>(1.01-2.72) * | 0.64<br>(0.35-1.15) | 1.80<br>(1.18-2.76) * | 1.31<br>(0.92-1.86)   | 0.58<br>(0.39-0.85) * | 2.20<br>(1.40-3.46) * | 1.23<br>(0.80-1.89)   | 0.40<br>(0.24-0.66) * |
| <b>Travel time: lower</b>              | 4.54<br>(1.39-15.55) * | 2.39<br>(1.09-5.29) * | 0.19<br>(0.04-0.81) *  | 1.89<br>(0.56-6.45) | 2.38<br>(0.86-6.62)   | 0.67<br>(0.20-2.32) | 1.77<br>(0.84-3.73)   | 1.73<br>(0.93-3.26)   | 0.54<br>(0.27-1.09)   | 2.43<br>(1.38-4.29) * | 1.09<br>(0.65-1.82)   | 0.25<br>(0.12-0.48) * |
| <b>Dist. to edge cult. area:</b>       | 2.11<br>(0.98-4.66)    | 1.27<br>(0.71-2.22)   | 0.37<br>(0.14-0.95) *  | 1.10<br>(0.52-2.32) | 1.78<br>(0.96-3.34)   | 0.57<br>(0.27-1.20) | 1.23<br>(0.47-3.26)   | 1.23<br>(0.56-2.67)   | 1.01<br>(0.40-2.60)   | 0.79<br>(0.54-1.16)   | 0.64<br>(0.46-0.89) * | 1.26<br>(0.80-1.99)   |
| <b>Dist. to edge cult. area: lower</b> | 1.85<br>(0.88-3.92)    | 1.11<br>(0.63-1.92)   | 0.50<br>(0.21-1.16)    | 1.13<br>(0.54-2.35) | 3.13<br>(1.68-5.89) * | 0.81<br>(0.40-1.67) | 1.10<br>(0.41-2.93)   | 1.08<br>(0.49-2.39)   | 1.05<br>(0.41-2.73)   | 0.75<br>(0.46-1.22)   | 0.73<br>(0.47-1.15)   | 1.29<br>(0.73-2.28)   |
| <b>Dist. to conflicts area:</b>        | 0.61<br>(0.24-1.49)    | 1.31<br>(0.72-2.41)   | 0.93<br>(0.33-2.61)    | 0.68<br>(0.36-1.28) | 0.62<br>(0.36-1.05)   | 1.29<br>(0.69-2.40) | 0.98<br>(0.60-1.60)   | 0.91<br>(0.61-1.37)   | 1.01<br>(0.63-1.60)   | 1.43<br>(0.99-2.07)   | 1.27<br>(0.92-1.76)   | 0.86<br>(0.56-1.32)   |
| <b>Dist.to conflicts area: lower</b>   | 0.82<br>(0.32-2.11)    | 1.64<br>(0.89-3.04)   | 0.77<br>(0.26-2.19)    | 0.68<br>(0.35-1.34) | 0.81<br>(0.46-1.42)   | 1.19<br>(0.62-2.28) | 0.94<br>(0.52-1.70)   | 0.57<br>(0.34-0.93) * | 1.28<br>(0.73-2.24)   | 1.21<br>(0.77-1.90)   | 1.64<br>(1.10-2.44) * | 0.90<br>(0.52-1.53)   |
| <b>Proximity to borders:</b>           | 0.82<br>(0.25-2.60)    | 0.90<br>(0.41-1.94)   | 0.90<br>(0.24-3.53)    | 1.28<br>(0.74-2.21) | 1.31<br>(0.84-2.09)   | 0.74<br>(0.43-1.25) | 0.92<br>(0.52-1.64)   | 0.89<br>(0.55-1.45)   | 0.88<br>(0.51-1.52)   | 1.24<br>(0.69-2.22)   | 0.92<br>(0.56-1.51)   | 0.84<br>(0.42-1.72)   |
| <b>Proximity to borders: lower</b>     | 0.28<br>(0.06-1.29)    | 0.83<br>(0.29-2.31)   | 5.63<br>(1.05-32.13) * | 1.45<br>(0.79-2.70) | 1.78<br>(1.06-2.99) * | 0.87<br>(0.48-1.59) | 1.08<br>(0.60-1.97)   | 1.11<br>(0.67-1.85)   | 0.64<br>(0.36-1.13)   | 0.88<br>(0.45-1.72)   | 0.56<br>(0.32-0.97) * | 1.39<br>(0.65-3.04)   |

Table S5: Factors associated with DTP1, MCV1 and composite coverage by region for the 2021 MICS-NICS using multilevel binary logistic regression models

| Characteristic                    | MICS-NICS             |                       |                            |                       |                       |                            |                       |                       |                            |                        |                       |                            |
|-----------------------------------|-----------------------|-----------------------|----------------------------|-----------------------|-----------------------|----------------------------|-----------------------|-----------------------|----------------------------|------------------------|-----------------------|----------------------------|
|                                   | North Central         |                       |                            | North East            |                       |                            | North West            |                       |                            | South                  |                       |                            |
|                                   | Receive<br>d<br>DTP1  | Receive<br>d<br>MCV1  | Receipt of<br>Zero<br>dose | Receive<br>d<br>DTP1  | Receive<br>d<br>MCV1  | Receipt of<br>Zero<br>dose | Receive<br>d<br>DTP1  | Receive<br>d<br>MCV1  | Receipt of<br>Zero<br>dose | Receive<br>d<br>DTP1   | Receive<br>d<br>MCV1  | Receipt of<br>Zero<br>dose |
|                                   | OR<br>(95%<br>CI)     | OR<br>(95%<br>CI)     | OR<br>(95%<br>CI)          | OR<br>(95%<br>CI)     | OR<br>(95%<br>CI)     | OR<br>(95%<br>CI)          | OR<br>(95%<br>CI)     | OR<br>(95%<br>CI)     | OR<br>(95%<br>CI)          | OR<br>(95%<br>CI)      | OR<br>(95%<br>CI)     | OR<br>(95%<br>CI)          |
| Sex of child: female              | 0.92<br>(0.67-1.28)   | 0.91<br>(0.69-1.20)   | 0.86<br>(0.59-1.27)        | 0.85<br>(0.63-1.15)   | 1.09<br>(0.83-1.43)   | 1.14<br>(0.85-1.53)        | 1.12<br>(0.86-1.45)   | 1.40<br>(1.08-1.82) * | 0.72<br>(0.55-0.95) *      | 0.76<br>(0.56-1.04)    | 0.80<br>(0.63-1.02)   | 1.33<br>(0.94-1.89)        |
| SBA:                              | 1.14<br>(0.72-1.79)   | 1.00<br>(0.68-1.46)   | 0.91<br>(0.51-1.61)        | 1.22<br>(0.78-1.89)   | 1.09<br>(0.74-1.59)   | 0.55<br>(0.34-0.88) *      | 1.10<br>(0.75-1.63)   | 1.13<br>(0.76-1.67)   | 0.88<br>(0.57-1.34)        | 0.93<br>(0.57-1.48)    | 0.98<br>(0.68-1.41)   | 0.91<br>(0.53-1.60)        |
| Birth quarter: Apr-Jun            | 0.91<br>(0.56-1.45)   | 0.84<br>(0.57-1.24)   | 0.78<br>(0.45-1.37)        | 0.71<br>(0.46-1.10)   | 0.87<br>(0.59-1.28)   | 1.02<br>(0.67-1.57)        | 1.21<br>(0.85-1.75)   | 1.06<br>(0.73-1.54)   | 0.70<br>(0.48-1.02)        | 1.03<br>(0.67-1.59)    | 1.05<br>(0.75-1.46)   | 0.98<br>(0.61-1.59)        |
| Birth quarter: Jul-               | 0.94<br>(0.58-1.52)   | 0.81<br>(0.55-1.20)   | 1.09<br>(0.63-1.91)        | 0.64<br>(0.42-0.96) * | 0.60<br>(0.42-0.88) * | 1.34<br>(0.89-2.02)        | 1.14<br>(0.80-1.61)   | 0.94<br>(0.66-1.33)   | 0.86<br>(0.60-1.23)        | 0.77<br>(0.49-1.20)    | 0.74<br>(0.53-1.04)   | 1.30<br>(0.80-2.12)        |
| Birth quarter: Oct-Dec            | 0.64<br>(0.39-1.02)   | 1.03<br>(0.69-1.54)   | 1.14<br>(0.66-2.00)        | 0.78<br>(0.49-1.23)   | 1.46<br>(0.97-2.19)   | 1.10<br>(0.70-1.73)        | 1.63<br>(1.11-2.40) * | 2.44<br>(1.65-3.63) * | 0.49<br>(0.32-0.74) *      | 1.10<br>(0.69-1.75)    | 1.54<br>(1.07-2.24) * | 0.63<br>(0.36-1.08)        |
| Mother received tetanus           | 3.35<br>(1.81-6.25) * | 2.74<br>(1.58-4.81) * | 0.20<br>(0.10-0.42) *      | 2.21<br>(1.06-4.64) * | 1.71<br>(0.88-3.33)   | 0.36<br>(0.18-0.72) *      | 2.51<br>(1.58-4.02) * | 2.43<br>(1.50-3.98) * | 0.32<br>(0.20-0.52) *      | 6.07<br>(3.41-10.89) * | 3.74<br>(2.25-6.26) * | 0.21<br>(0.11-0.39) *      |
| ANC visits: 1-3                   | 0.81<br>(0.40-1.60)   | 0.81<br>(0.43-1.49)   | 1.11<br>(0.50-2.44)        | 1.15<br>(0.53-2.47)   | 1.20<br>(0.59-2.42)   | 0.77<br>(0.38-1.59)        | 0.70<br>(0.42-1.16)   | 0.72<br>(0.42-1.22)   | 1.47<br>(0.88-2.46)        | 1.18<br>(0.57-2.48)    | 0.69<br>(0.37-1.26)   | 0.83<br>(0.36-1.86)        |
| ANC visits:                       | 1.48<br>(0.75-2.89)   | 1.12<br>(0.61-2.02)   | 0.79<br>(0.36-1.73)        | 1.56<br>(0.72-3.38)   | 1.23<br>(0.61-2.48)   | 0.84<br>(0.40-1.77)        | 1.56<br>(0.95-2.54)   | 0.91<br>(0.54-1.52)   | 0.77<br>(0.46-1.29)        | 1.49<br>(0.85-2.56)    | 1.03<br>(0.63-1.67)   | 0.63<br>(0.35-1.15)        |
| Mother's age: 20-29               | 0.35<br>(0.21-0.60) * | 0.45<br>(0.28-0.72) * | 1.96<br>(1.09-3.54) *      | 0.37<br>(0.22-0.64) * | 0.55<br>(0.34-0.88) * | 2.35<br>(1.48-3.76) *      | 1.02<br>(0.65-1.60)   | 0.96<br>(0.61-1.53)   | 1.38<br>(0.86-2.24)        | 0.28<br>(0.16-0.50) *  | 0.60<br>(0.37-0.96) * | 2.22<br>(1.20-4.11) *      |
| Mother's age:                     | 0.54<br>(0.30-0.97) * | 0.55<br>(0.33-0.90) * | 1.85<br>(0.96-3.58)        | 0.37<br>(0.21-0.66) * | 0.59<br>(0.36-0.98) * | 1.84<br>(1.11-3.07) *      | 1.18<br>(0.72-1.94)   | 1.06<br>(0.64-1.76)   | 1.47<br>(0.88-2.50)        | 0.35<br>(0.19-0.63) *  | 0.68<br>(0.42-1.11)   | 1.83<br>(0.97-3.43) *      |
| Mother's age: 40-49               | 0.67<br>(0.31-1.46)   | 0.64<br>(0.34-1.23)   | 1.40<br>(0.55-3.41)        | 0.53<br>(0.25-1.11)   | 0.66<br>(0.34-1.28)   | 2.09<br>(1.08-4.04) *      | 1.55<br>(0.86-2.81)   | 1.91<br>(1.05-3.50) * | 1.17<br>(0.63-2.18)        | 0.17<br>(0.08-0.34) *  | 0.55<br>(0.30-0.99) * | 3.51<br>(1.68-7.28) *      |
| Mother's education:               | 1.36<br>(0.87-2.14)   | 1.07<br>(0.72-1.57)   | 0.63<br>(0.36-1.08)        | 1.84<br>(1.11-3.09) * | 1.87<br>(1.20-2.93) * | 0.53<br>(0.32-0.88) *      | 1.26<br>(0.85-1.88)   | 1.23<br>(0.83-1.85)   | 0.75<br>(0.49-1.13)        | 1.17<br>(0.67-2.00)    | 0.54<br>(0.32-0.90) * | 0.61<br>(0.34-1.10)        |
| Mother's education: junior/higher | 2.10<br>(1.32-3.35) * | 2.00<br>(1.35-2.97) * | 0.67<br>(0.39-1.17)        | 3.26<br>(1.99-5.44) * | 2.10<br>(1.39-3.17) * | 0.32<br>(0.18-0.55) *      | 1.86<br>(1.13-3.06) * | 2.17<br>(1.33-3.55) * | 0.66<br>(0.38-1.13)        | 1.89<br>(1.12-3.17) *  | 1.30<br>(0.79-2.11)   | 0.42<br>(0.24-0.74) *      |
| Religion:                         | 1.99<br>(1.31-3.03) * | 1.46<br>(1.04-2.07) * | 0.61<br>(0.37-1.00)        | 3.55<br>(1.82-7.12) * | 3.06<br>(1.81-5.27) * | 0.34<br>(0.17-0.66) *      | 2.16<br>(0.82-5.99)   | 1.78<br>(0.72-4.52)   | 0.22<br>(0.05-0.76) *      | 1.65<br>(1.06-2.55) *  | 1.27<br>(0.85-1.88)   | 0.95<br>(0.57-1.62)        |
| Christian/traditionalist/ot       | 0.62<br>(0.41-0.94) * | 0.69<br>(0.48-0.98) * | 1.13<br>(0.69-1.85)        | 1.67<br>(1.11-2.53) * | 1.29<br>(0.90-1.85)   | 0.55<br>(0.36-0.84) *      | 0.86<br>(0.61-1.20)   | 0.90<br>(0.64-1.26)   | 1.20<br>(0.85-1.71)        | 1.02<br>(0.66-1.57)    | 0.84<br>(0.59-1.18)   | 1.29<br>(0.79-2.13)        |
| Phone/internet: yes               | 1.05<br>(0.65-1.69)   | 1.03<br>(0.70-1.52)   | 0.57<br>(0.32-1.01)        | 0.71<br>(0.44-1.13)   | 0.92<br>(0.62-1.36)   | 1.08<br>(0.68-1.71)        | 1.20<br>(0.79-1.80)   | 1.39<br>(0.92-2.12)   | 0.76<br>(0.50-1.17)        | 1.17<br>(0.81-1.70)    | 1.04<br>(0.78-1.39)   | 0.79<br>(0.52-1.20)        |
| Land ownership:                   | 1.07<br>(0.51-2.14)   | 1.42<br>(0.79-2.50)   | 1.05<br>(0.46-2.61)        | 0.80<br>(0.25-2.33)   | 1.09<br>(0.45-2.59)   | 1.99<br>(0.60-8.26)        | 1.98<br>(0.58-6.58)   | 2.57<br>(0.78-8.71)   | 0.59<br>(0.17-2.17)        | 1.10<br>(0.71-1.66)    | 1.24<br>(0.88-1.72)   | 1.02<br>(0.64-1.65)        |
| Sex of household head: male       | 2.75<br>(1.71-4.49) * | 1.33<br>(0.90-1.96)   | 0.39<br>(0.22-0.68) *      | 1.33<br>(0.81-2.20)   | 1.28<br>(0.83-1.97)   | 0.69<br>(0.43-1.11)        | 1.18<br>(0.80-1.74)   | 1.13<br>(0.76-1.66)   | 0.87<br>(0.57-1.31)        | 1.72<br>(1.13-2.63) *  | 1.28<br>(0.92-1.80)   | 0.72<br>(0.45-1.15)        |
| Wealth:                           | 4.72<br>(2.52-9.05) * | 2.59<br>(1.57-4.33) * | 0.13<br>(0.05-0.29) *      | 1.62<br>(0.84-3.15)   | 1.48<br>(0.85-2.57)   | 0.77<br>(0.39-1.50)        | 1.35<br>(0.76-2.41)   | 1.17<br>(0.66-2.09)   | 0.61<br>(0.32-1.14)        | 2.28<br>(1.39-3.79) *  | 2.23<br>(1.51-3.31) * | 0.47<br>(0.26-0.81) *      |
| Wealth: rich/richest              | 1.75<br>(1.11-2.75) * | 1.46<br>(0.97-2.19) * | 0.63<br>(0.36-1.08) *      | 1.32<br>(0.85-2.00) * | 0.93<br>(0.61-1.42) * | 1.18<br>(0.77-1.81) *      | 2.91<br>(1.81-4.84) * | 2.42<br>(1.50-4.02) * | 0.37<br>(0.24-0.55) *      | 1.47<br>(0.97-2.21) *  | 1.36<br>(0.92-2.00) * | 0.75<br>(0.48-1.15) *      |
| Access to bank account: yes       |                       |                       |                            |                       |                       |                            |                       |                       |                            |                        |                       |                            |

|                                        |               |               |                |               |               |                |                |               |               |               |               |             |
|----------------------------------------|---------------|---------------|----------------|---------------|---------------|----------------|----------------|---------------|---------------|---------------|---------------|-------------|
|                                        | (0.93-3.43)   | (0.91-2.36)   | (0.25-1.46)    | (0.70-2.54)   | (0.56-1.55)   | (0.58-2.33)    | (1.56-5.61) *  | (1.35-4.42) * | (0.18-0.73) * | (0.91-2.41)   | (0.96-1.92)   | (0.43-1.30) |
| <b>Household size: 5-8 (medium)</b>    | 1.19          | 1.04          | 0.72           | 1.20          | 0.78          | 0.96           | 1.00           | 0.98          | 1.20          | 0.96          | 0.96          | 1.15        |
|                                        | (0.80-1.78)   | (0.74-1.47)   | (0.46-1.13)    | (0.84-1.71)   | (0.57-1.07)   | (0.68-1.34)    | (0.74-1.35)    | (0.72-1.33)   | (0.88-1.65)   | (0.59-1.54)   | (0.65-1.42)   | (0.68-1.98) |
| <b>Household size: ≤4</b>              | 1.34          | 1.39          | 0.58           | 1.23          | 0.86          | 0.76           | 1.04           | 0.74          | 1.52          | 1.26          | 1.11          | 0.83        |
|                                        | (0.82-2.18)   | (0.92-2.10)   | (0.33-1.02)    | (0.76-2.01)   | (0.56-1.31)   | (0.47-1.21)    | (0.69-1.56)    | (0.49-1.12)   | (0.99-2.35)   | (0.73-2.15)   | (0.72-1.70)   | (0.46-1.53) |
| <b>Rural/urban: urban</b>              | 0.22          | 0.42          | 3.86           | 0.97          | 1.77          | 0.73           | 0.96           | 0.69          | 1.26          | 1.77          | 1.31          | 0.66        |
|                                        | (0.11-0.47) * | (0.24-0.75) * | (1.53-9.73) *  | (0.45-2.10)   | (0.96-3.32)   | (0.41-1.31)    | (0.51-1.82)    | (0.34-1.38)   | (0.66-2.41)   | (1.07-2.96) * | (0.90-1.91)   | (0.37-1.14) |
| <b>Livestock density:</b>              | 0.79          | 0.62          | 1.98           | 0.35          | 0.64          | 3.53           | 0.67           | 0.85          | 1.19          | 0.96          | 1.22          | 1.00        |
|                                        | (0.38-1.55)   | (0.37-1.02)   | (0.75-6.02)    | (0.11-1.03)   | (0.28-1.47)   | (1.24-11.95) * | (0.44-1.01)    | (0.49-1.46)   | (0.72-1.98)   | (0.63-1.47)   | (0.85-1.75)   | (0.61-1.61) |
| <b>Livestock density: lower</b>        | 0.38          | 0.46          | 4.39           | 0.41          | 0.82          | 3.07           | 1.34           | 1.00          | 0.91          | 1.05          | 1.54          | 1.12        |
|                                        | (0.17-0.79) * | (0.26-0.82) * | (1.56-14.18) * | (0.11-1.41)   | (0.31-2.11)   | (0.99-11.12)   | (0.77-2.31)    | (0.46-2.15)   | (0.44-1.90)   | (0.64-1.72)   | (0.97-2.44)   | (0.64-1.94) |
|                                        |               |               |                |               |               |                |                |               |               |               |               | 0.58        |
| <b>Travel time:</b>                    | 1.74          | 1.32          | 0.79           | 0.74          | 0.63          | 1.50           | 0.50           | 0.70          | 1.26          | 1.77          | 1.66          | (0.35-0.97) |
|                                        | (1.16-2.64) * | (0.93-1.87)   | (0.49-1.26)    | (0.42-1.30)   | (0.39-0.99) * | (1.01-2.23) *  | (0.34-0.74) *  | (0.43-1.13)   | (0.80-1.98)   | (1.12-2.81) * | (1.12-2.44) * | *           |
| <b>Travel time: lower</b>              | 1.61          | 1.11          | 0.56           | 0.97          | 0.77          | 1.25           | 0.77           | 1.20          | 1.11          | 1.38          | 1.82          | 0.65        |
|                                        | (0.80-3.25)   | (0.64-1.93)   | (0.23-1.34)    | (0.32-2.92)   | (0.32-1.83)   | (0.52-3.00)    | (0.34-1.73)    | (0.48-2.98)   | (0.47-2.61)   | (0.81-2.37)   | (1.19-2.79) * | (0.35-1.19) |
| <b>Dist. to edge cult. area:</b>       | 0.91          | 0.81          | 1.43           | 1.67          | 1.51          | 0.95           | 0.67           | 1.11          | 1.57          | 1.39          | 1.07          | 0.96        |
|                                        | (0.57-1.44)   | (0.56-1.16)   | (0.82-2.52)    | (0.70-3.97)   | (0.75-3.06)   | (0.47-1.94)    | (0.23-1.85)    | (0.39-3.09)   | (0.53-4.90)   | (0.92-2.11)   | (0.77-1.49)   | (0.61-1.53) |
| <b>Dist. to edge cult. area: lower</b> | 0.58          | 0.71          | 1.58           | 2.17          | 1.69          | 0.72           | 1.20           | 1.33          | 1.30          | 1.10          | 0.96          | 1.34        |
|                                        | (0.37-0.91) * | (0.49-1.04)   | (0.90-2.78)    | (0.89-5.42)   | (0.83-3.52)   | (0.34-1.50)    | (0.42-3.38)    | (0.47-3.78)   | (0.43-4.12)   | (0.65-1.88)   | (0.62-1.51)   | (0.74-2.43) |
| <b>Dist. to conflicts area:</b>        | 0.99          | 0.75          | 0.78           | 1.14          | 1.11          | 0.83           | 1.36           | 1.04          | 0.85          | 1.22          | 1.32          | 0.65        |
|                                        | (0.63-1.55)   | (0.51-1.10)   | (0.46-1.33)    | (0.62-2.11)   | (0.68-1.82)   | (0.54-1.29)    | (0.57-3.24)    | (0.40-2.69)   | (0.34-2.10)   | (0.74-2.00)   | (0.87-2.00)   | (0.38-1.12) |
| <b>Dist.to conflicts area: lower</b>   | 1.56          | 0.84          | 0.32           | 0.73          | 0.67          | 0.80           | 5.07           | 1.97          | 0.25          | 0.81          | 0.93          | 1.15        |
|                                        | (0.96-2.55)   | (0.57-1.25)   | (0.17-0.60) *  | (0.36-1.45)   | (0.38-1.16)   | (0.47-1.40)    | (1.71-15.78) * | (0.67-5.90)   | (0.06-0.88) * | (0.48-1.36)   | (0.58-1.47)   | (0.66-2.03) |
| <b>Proximity to borders:</b>           | 1.33          | 1.28          | 1.07           | 1.30          | 1.17          | 1.21           | 1.04           | 0.93          | 0.88          | 0.56          | 1.10          | 1.51        |
|                                        | (0.72-2.51)   | (0.76-2.19)   | (0.52-2.15)    | (0.71-2.41)   | (0.70-1.96)   | (0.78-1.88)    | (0.61-1.75)    | (0.47-1.85)   | (0.47-1.63)   | (0.26-1.14)   | (0.64-1.88)   | (0.68-3.68) |
| <b>Proximity to borders: lower</b>     | 0.41          | 0.55          | 1.86           | 3.55          | 2.41          | 0.42           | 2.26           | 2.20          | 0.43          | 0.40          | 0.69          | 1.97        |
|                                        | (0.21-0.82) * | (0.30-0.99) * | (0.84-4.02)    | (1.60-8.06) * | (1.25-4.71) * | (0.23-0.79) *  | (1.31-3.93) *  | (1.09-4.48) * | (0.23-0.82) * | (0.18-0.80) * | (0.39-1.20)   | (0.90-4.76) |
